# Supplementary material for: A Whole-Genome Analysis of the African Swine Fever Virus That Circulated during the First Outbreak in Vietnam in 2019 and Subsequently in 2022
Source: MDPI journal article supplement (doi:10.3390/v15091945), 2023-09-18

Figure S1. Sequence alignment of open reading frames(ORFs) compared between VN/HY/2019-ASFV1(represented by VN\_HA-ASFV1) and VN/QP/2019-ASFV1(represented by VN\_QP-ASFV1 with other ASFV strains.

(a) Sequence Alignment of EP153R nucleotides

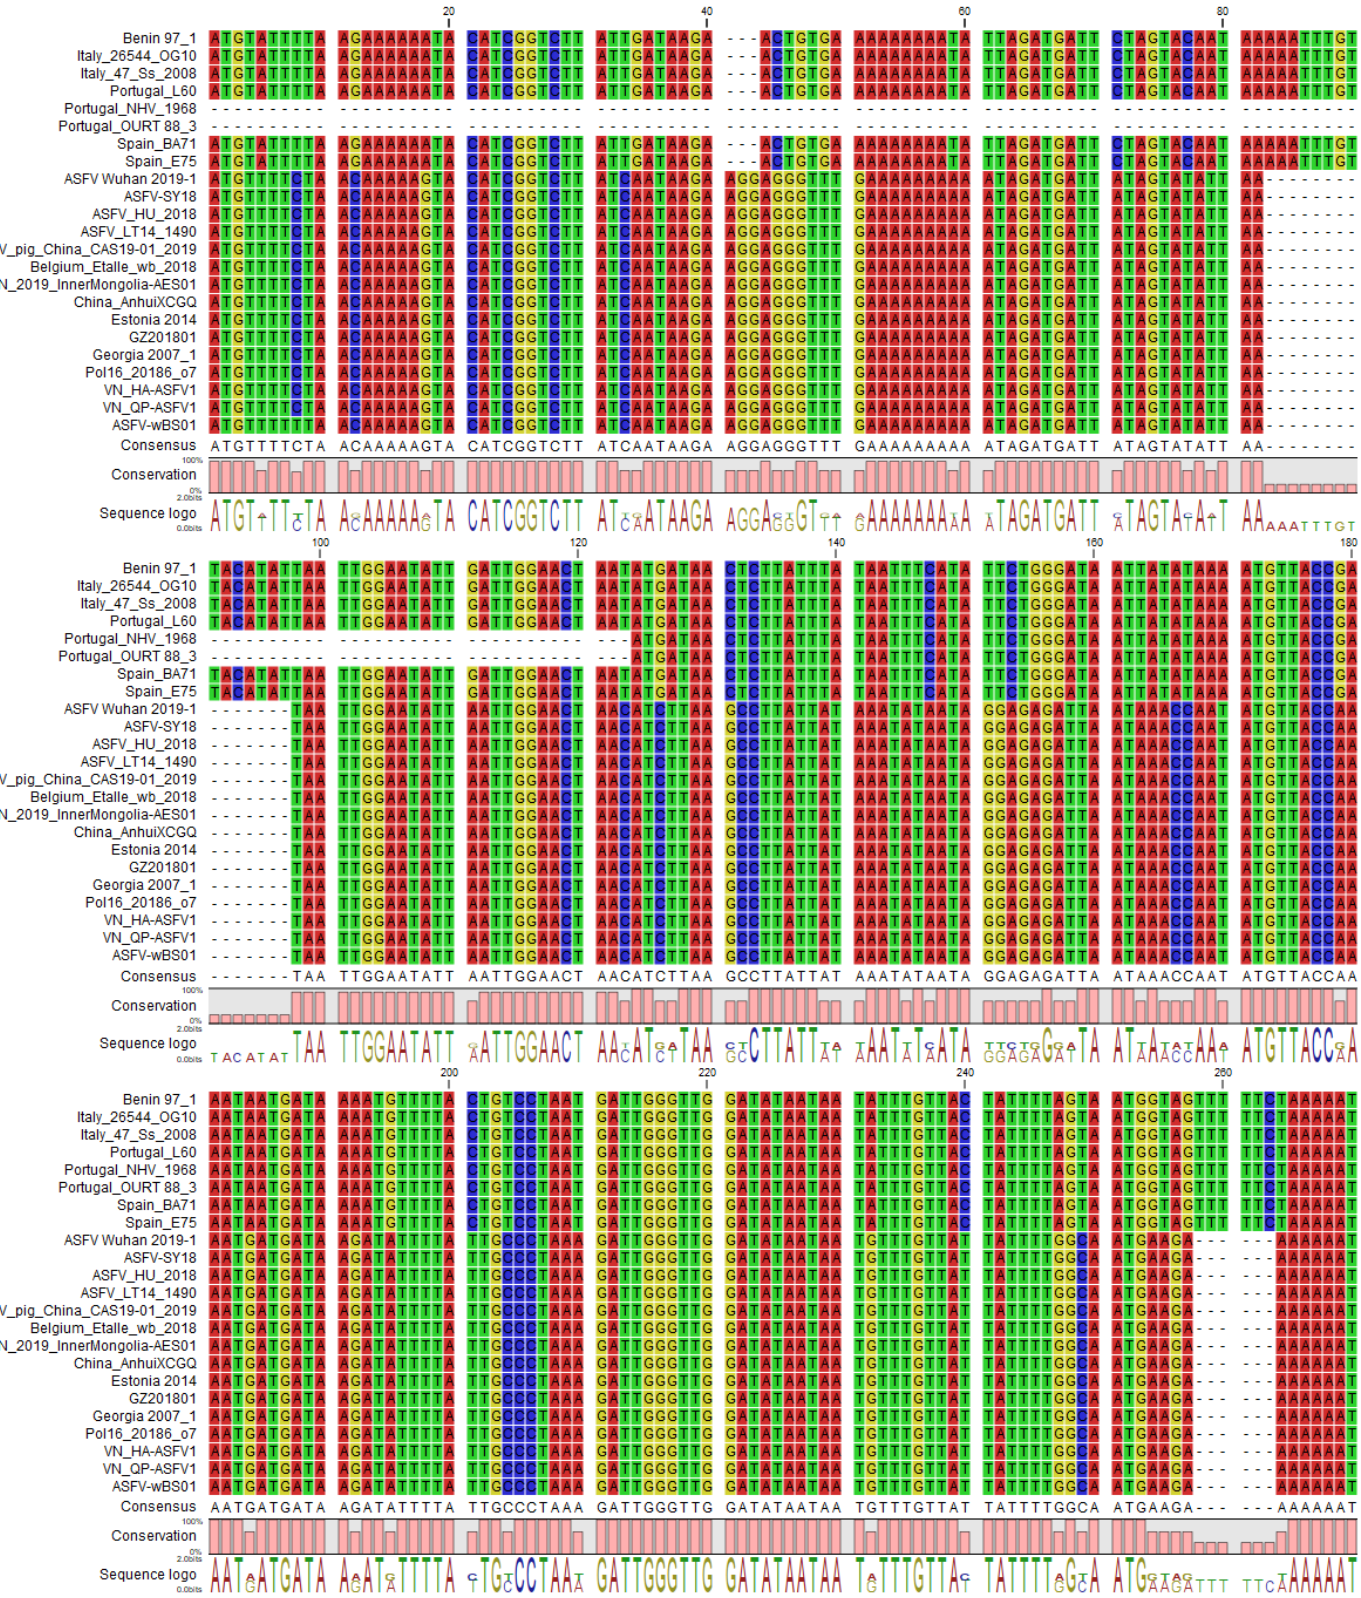

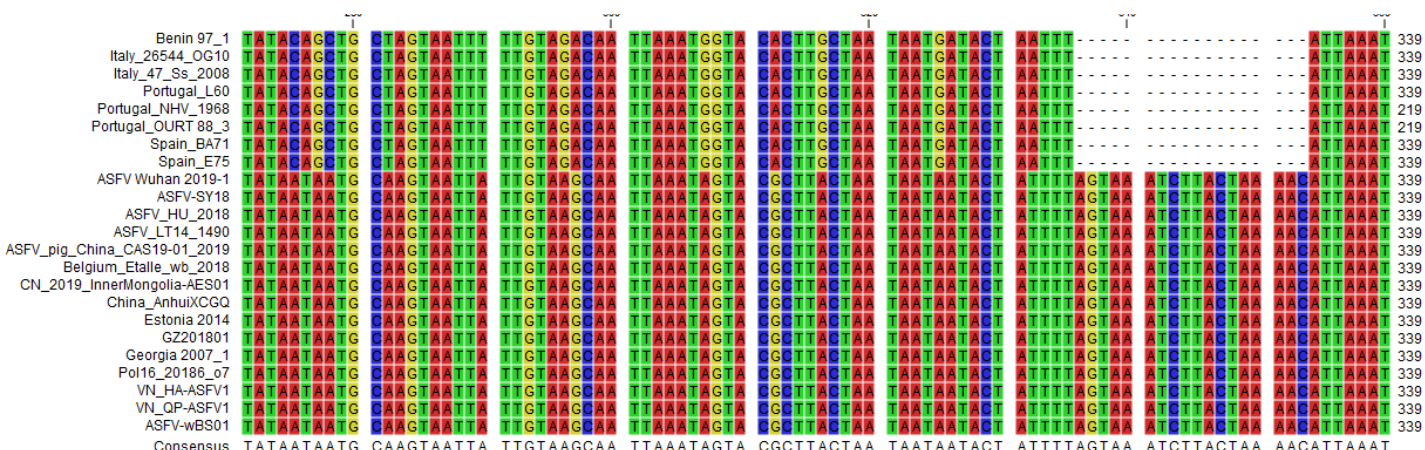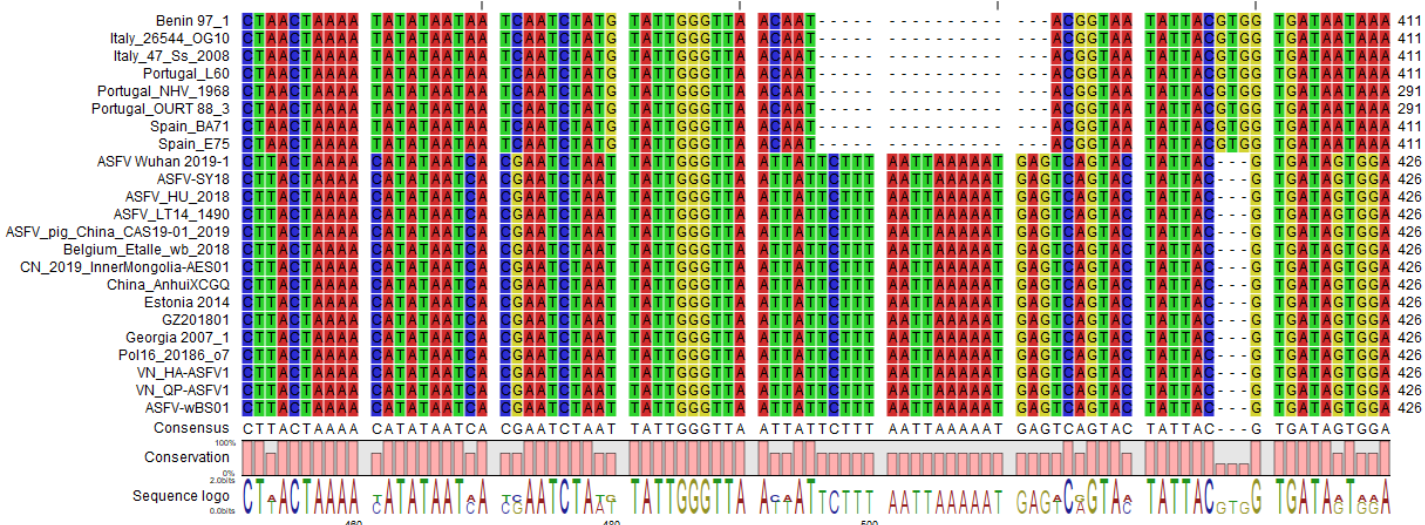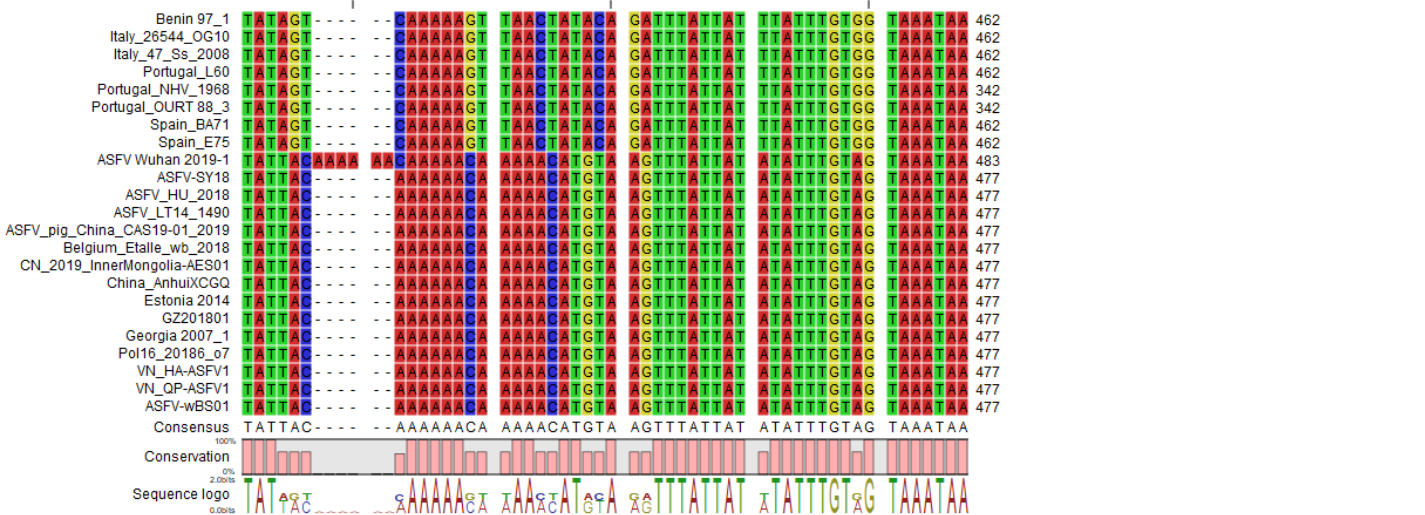



(b) Sequence Alignment of EP153R proteins

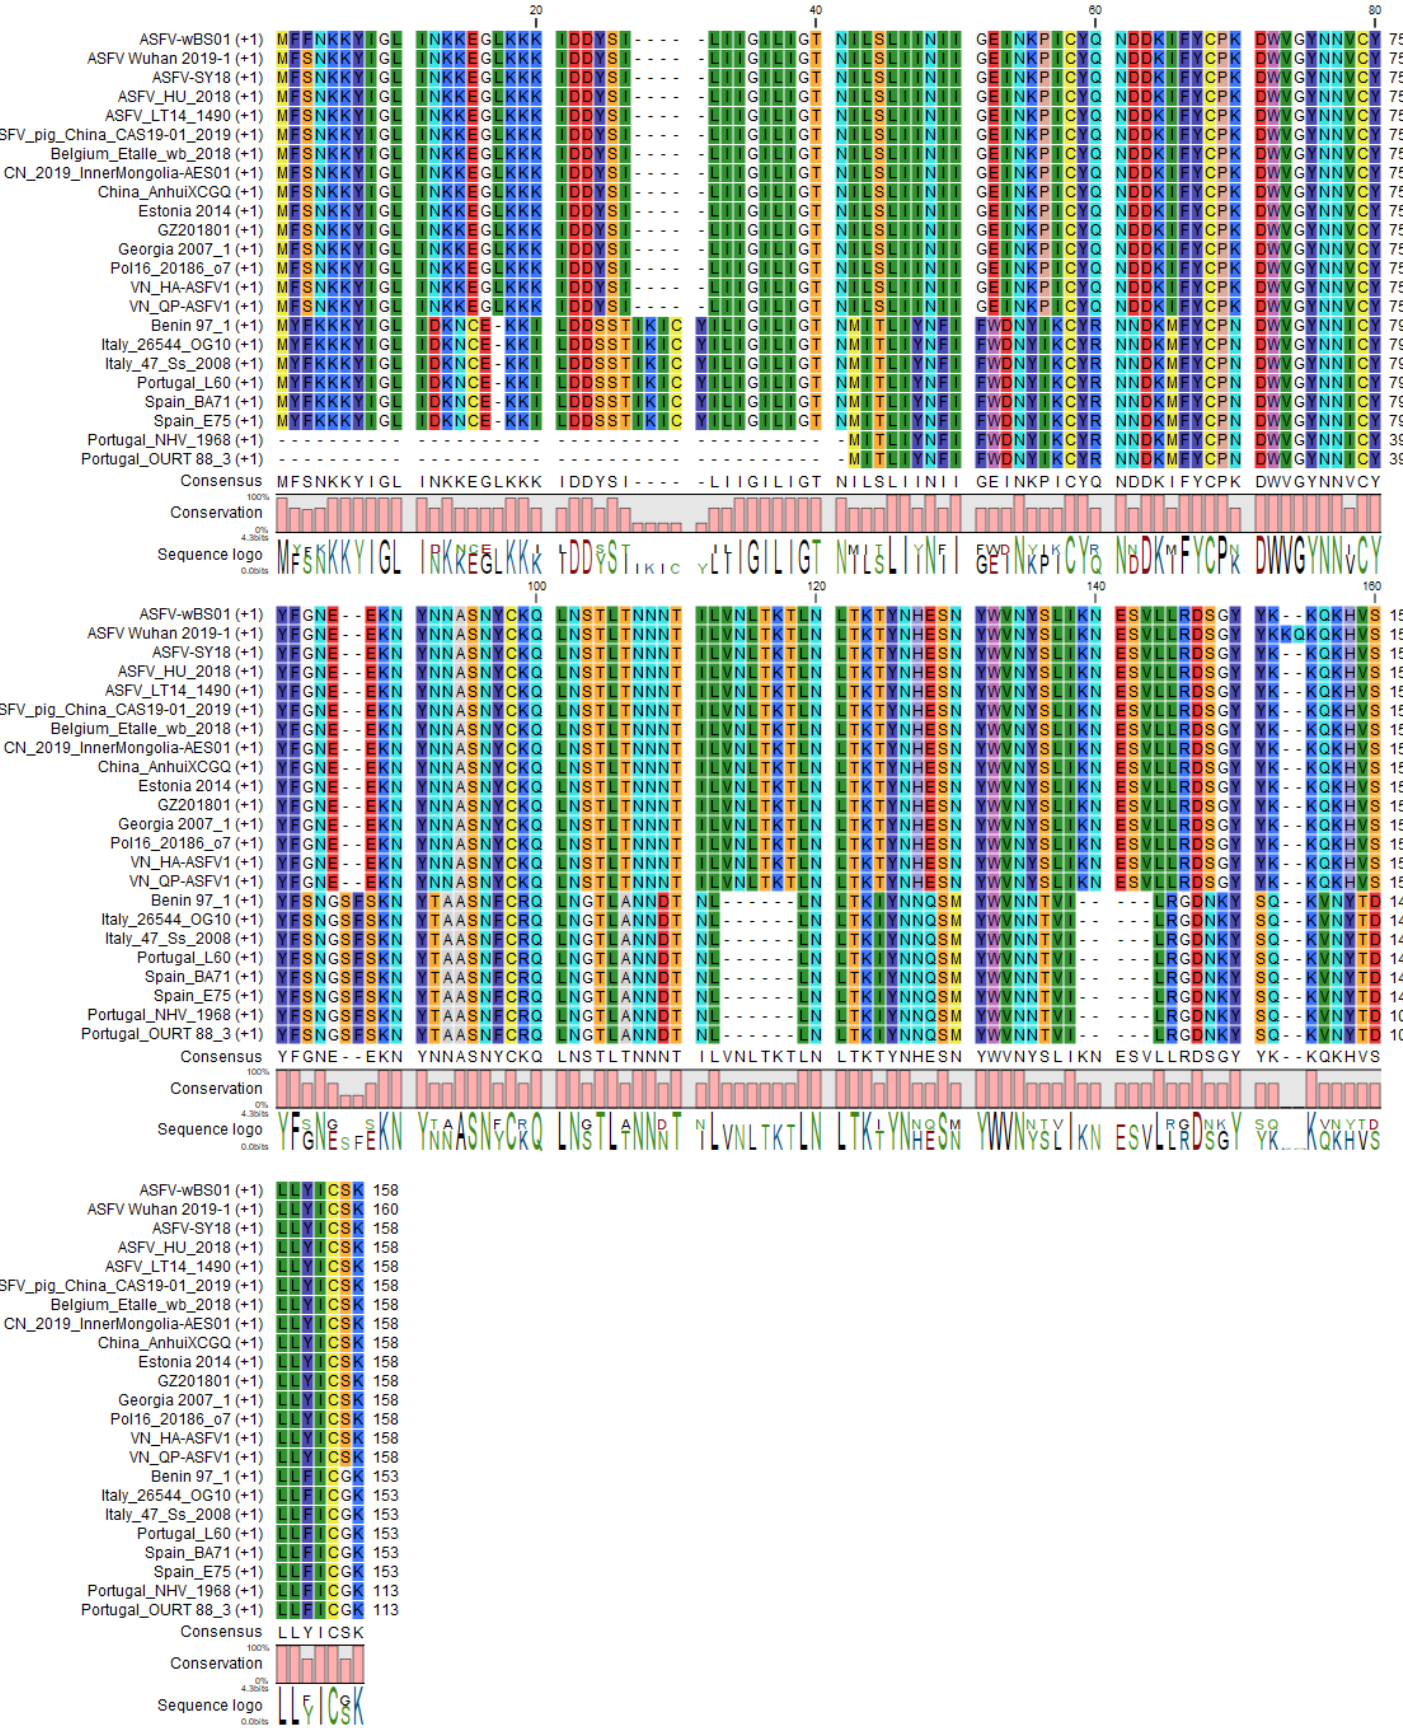

(c) Sequence Alignment of MGF360-1L nucleotides

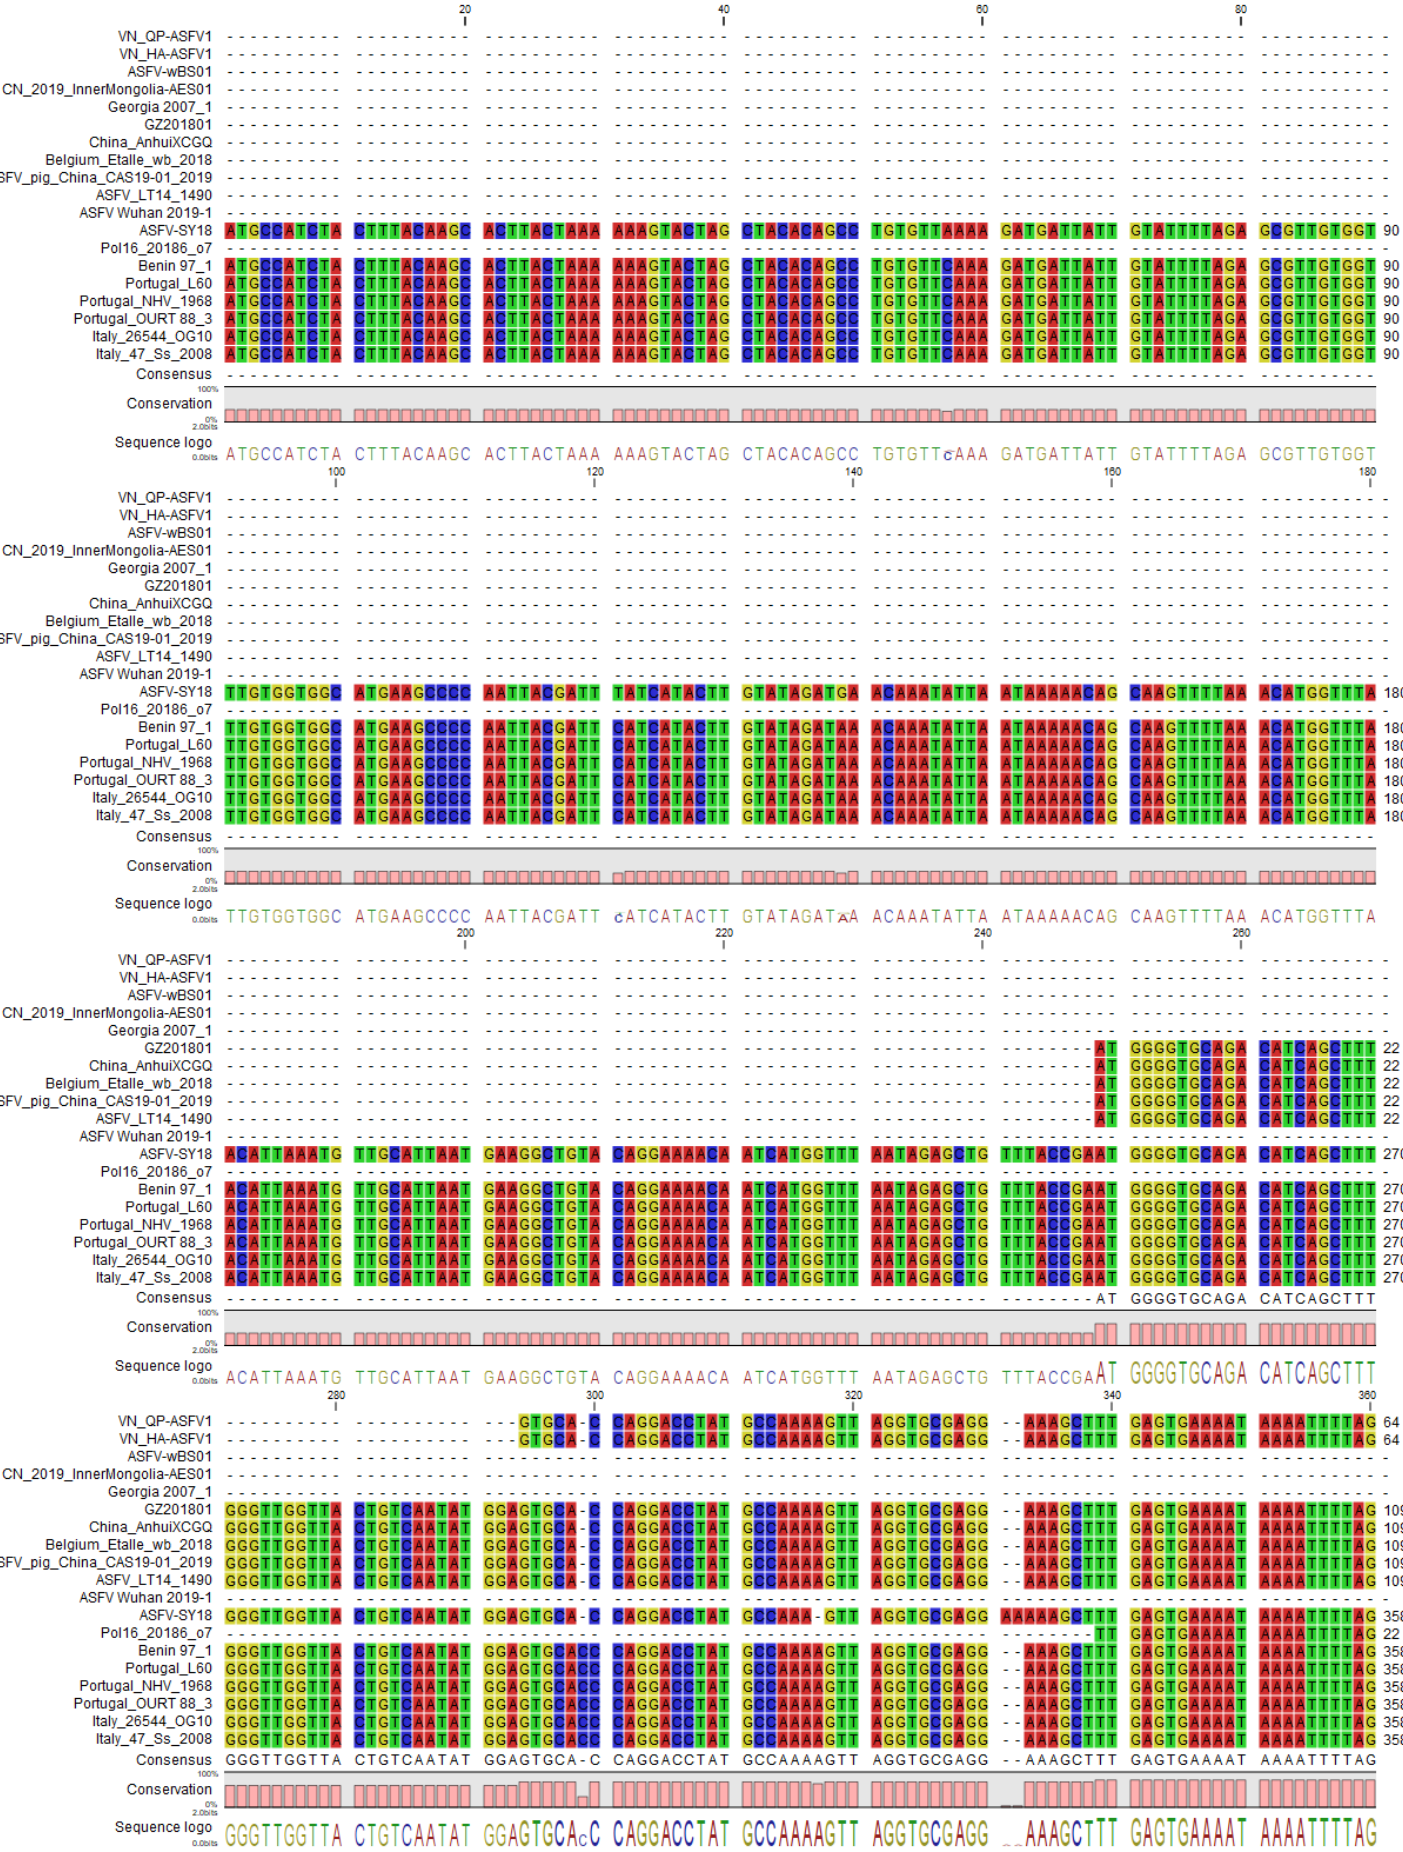



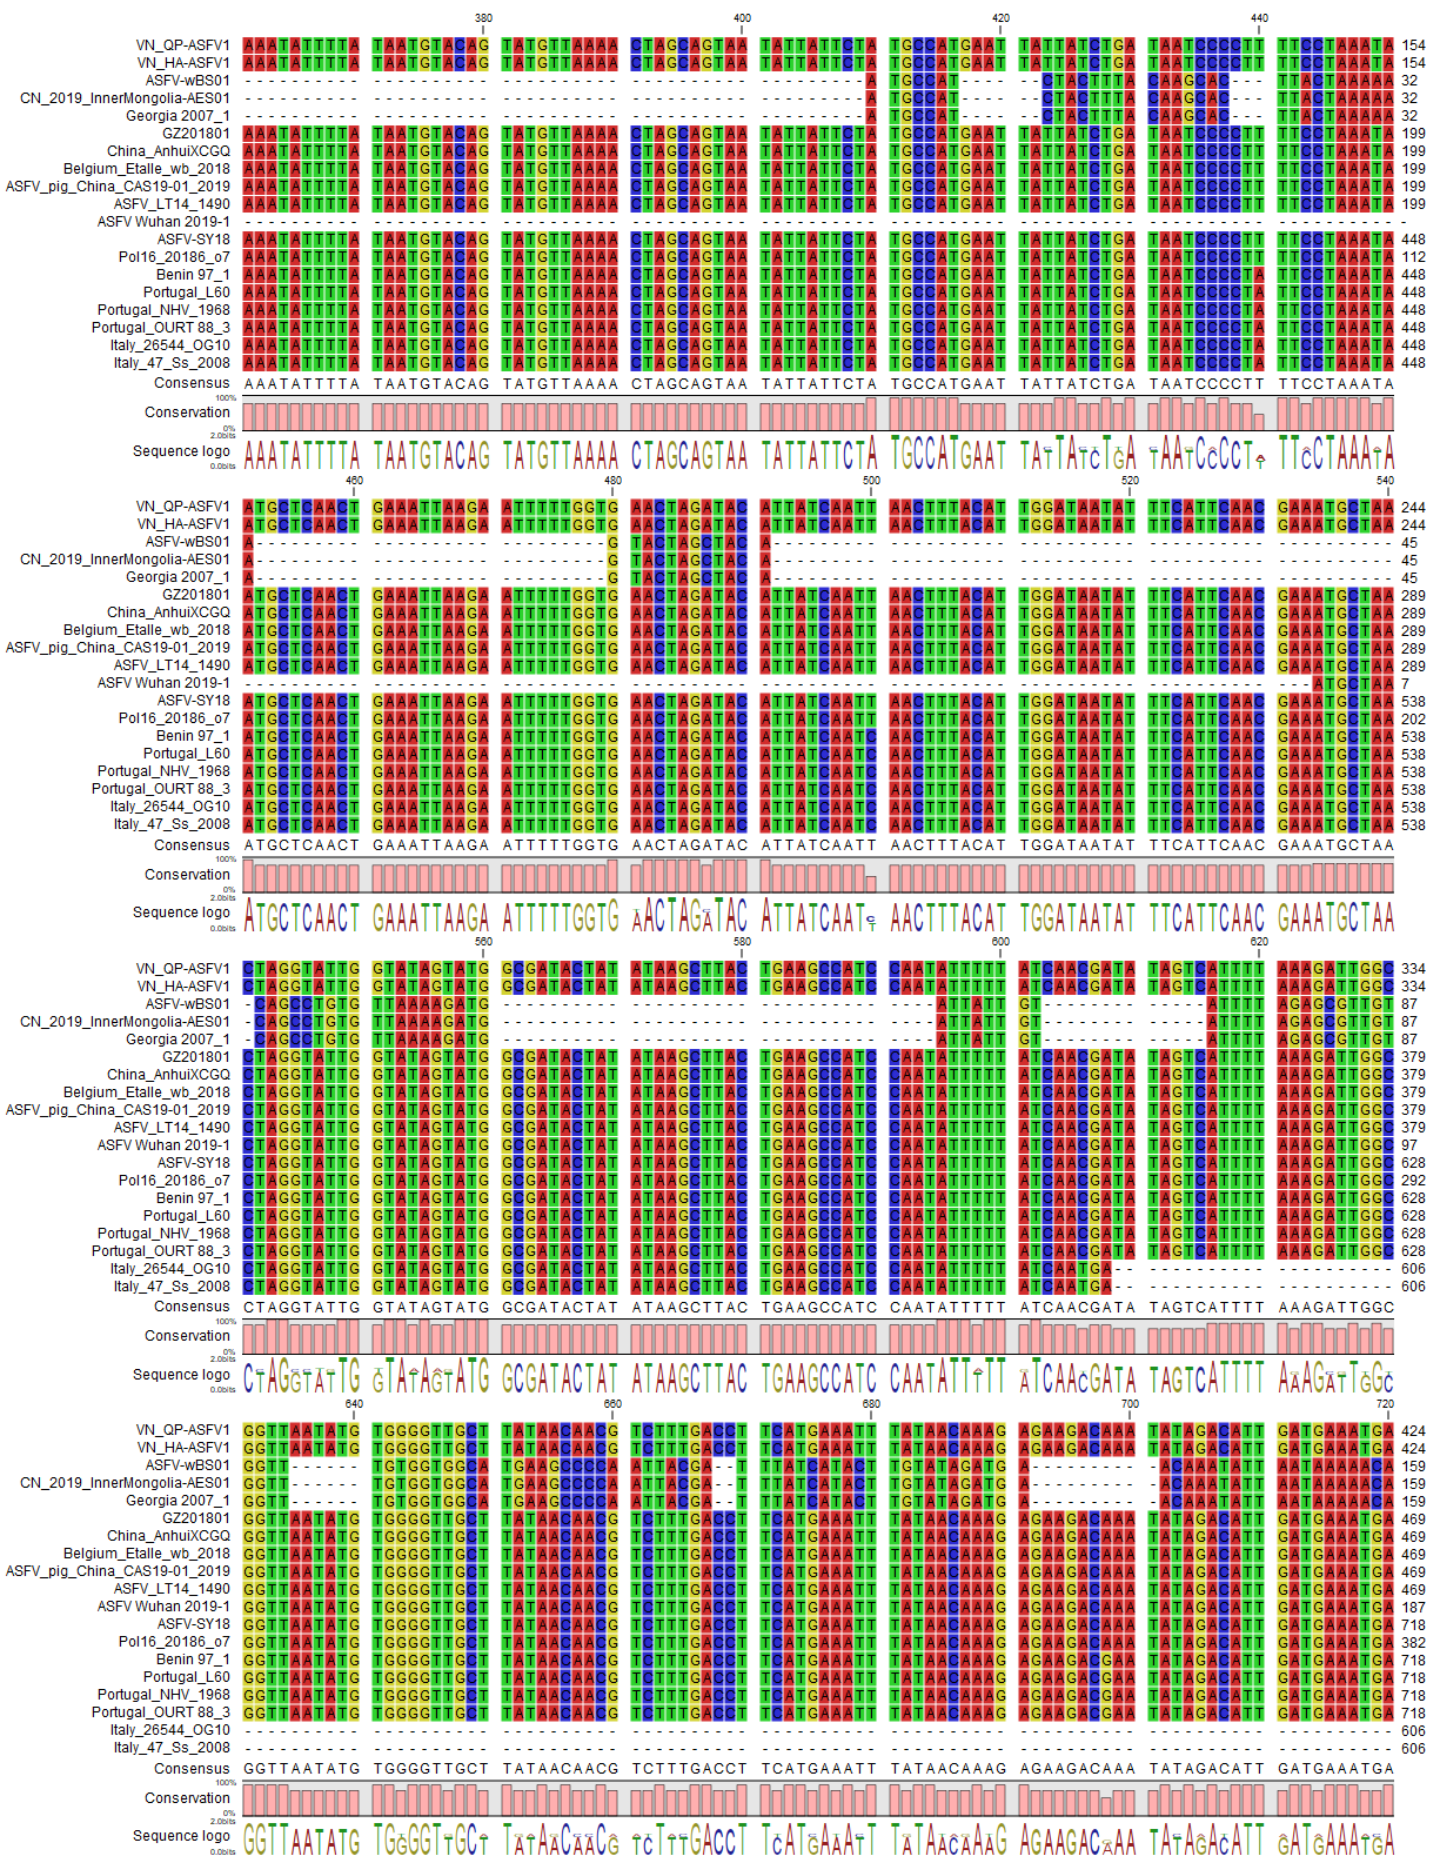

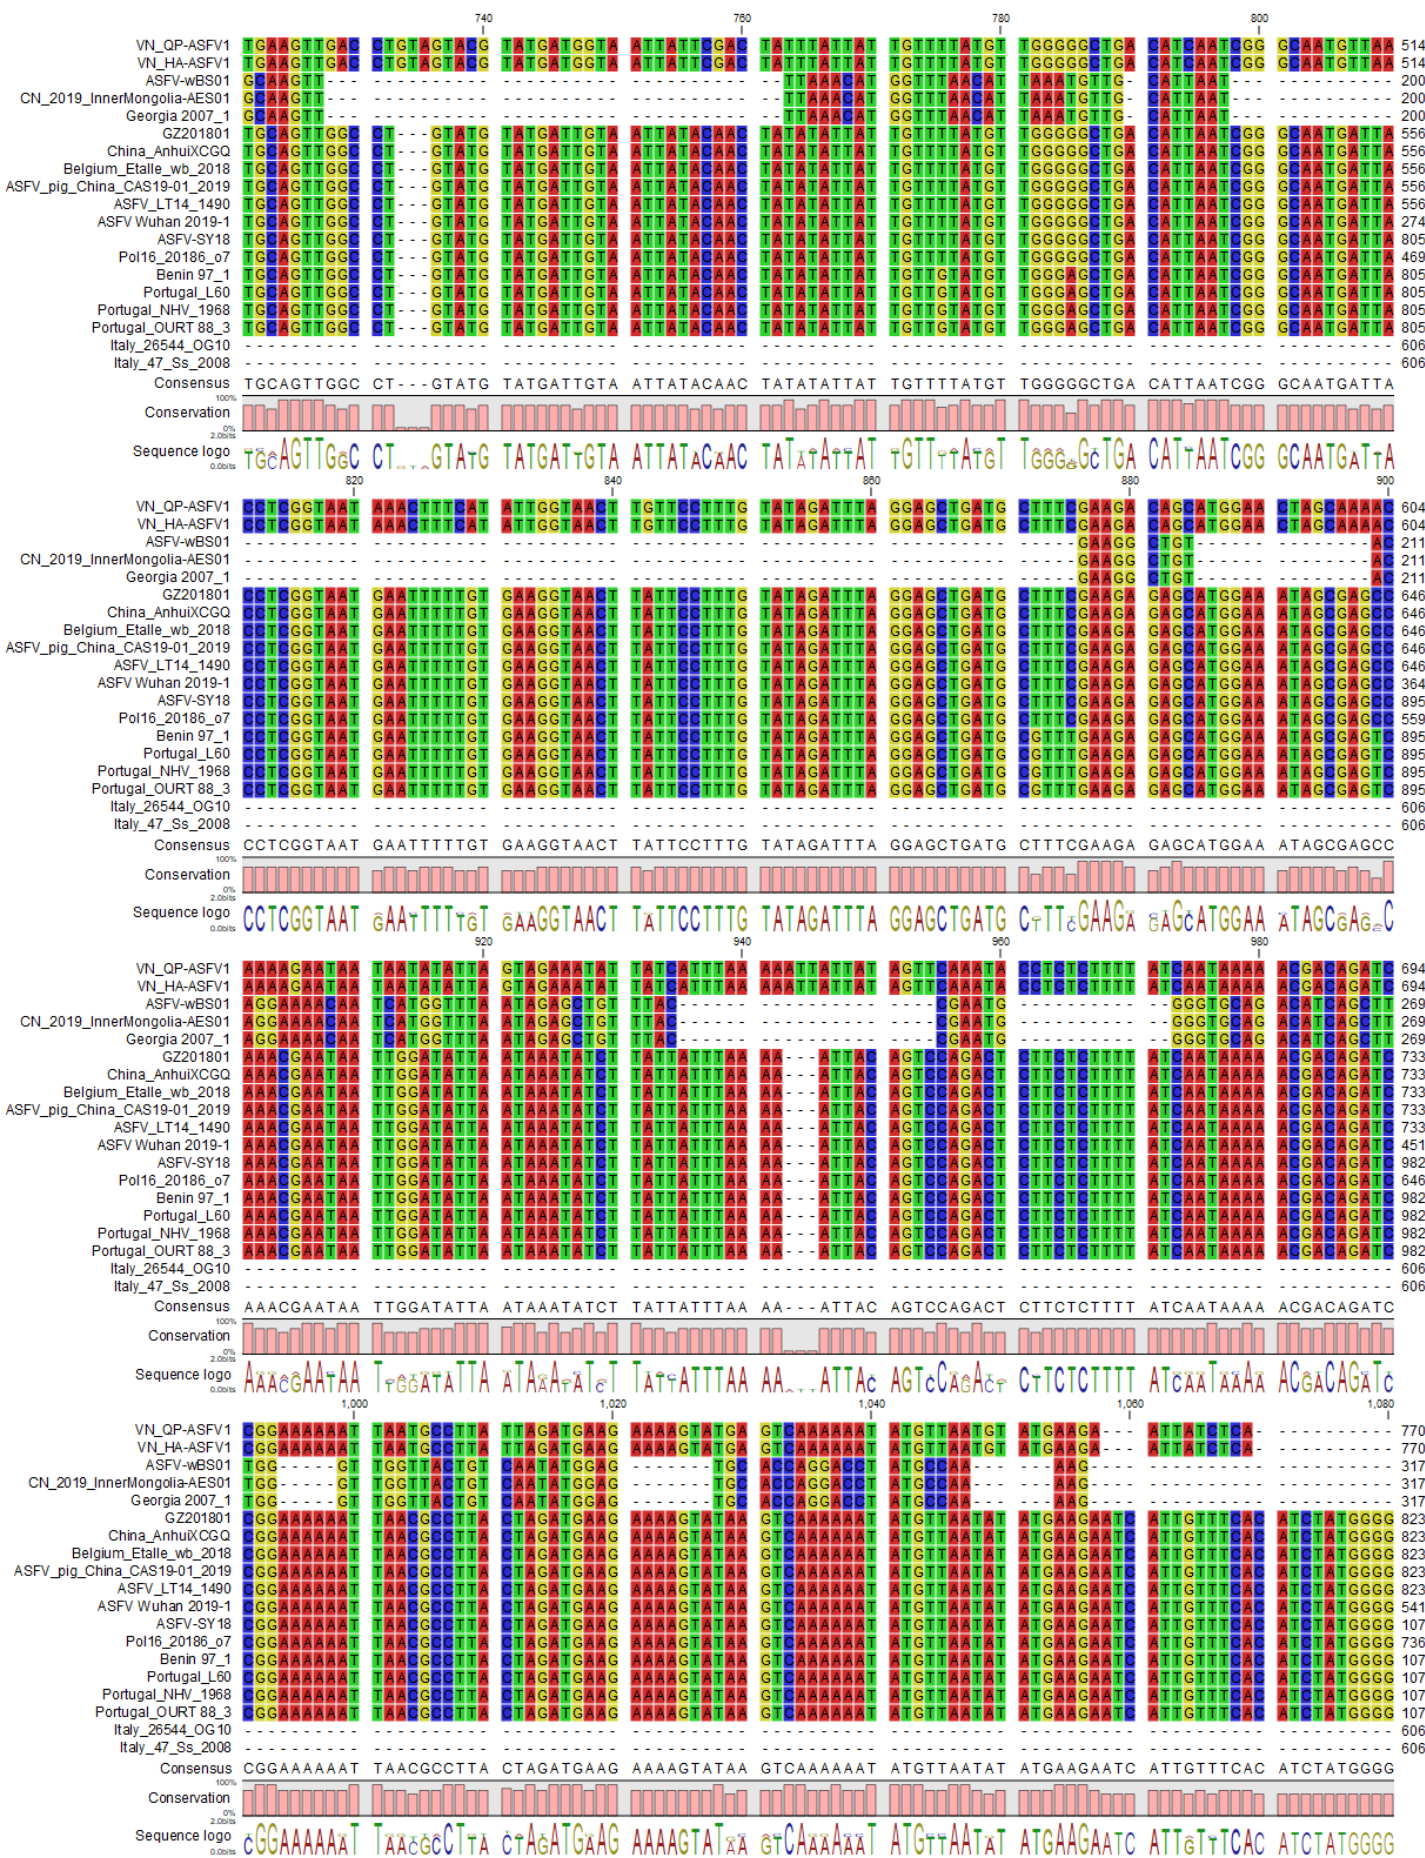

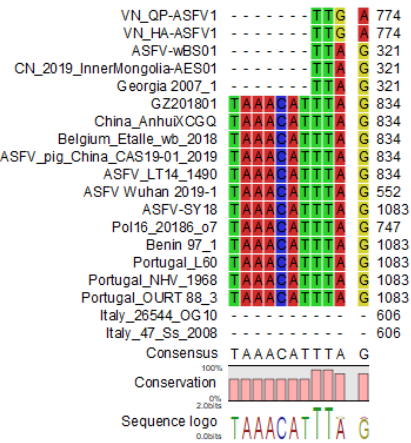

0.0016



(d) Sequence Alignment of MGF360-1L proteins

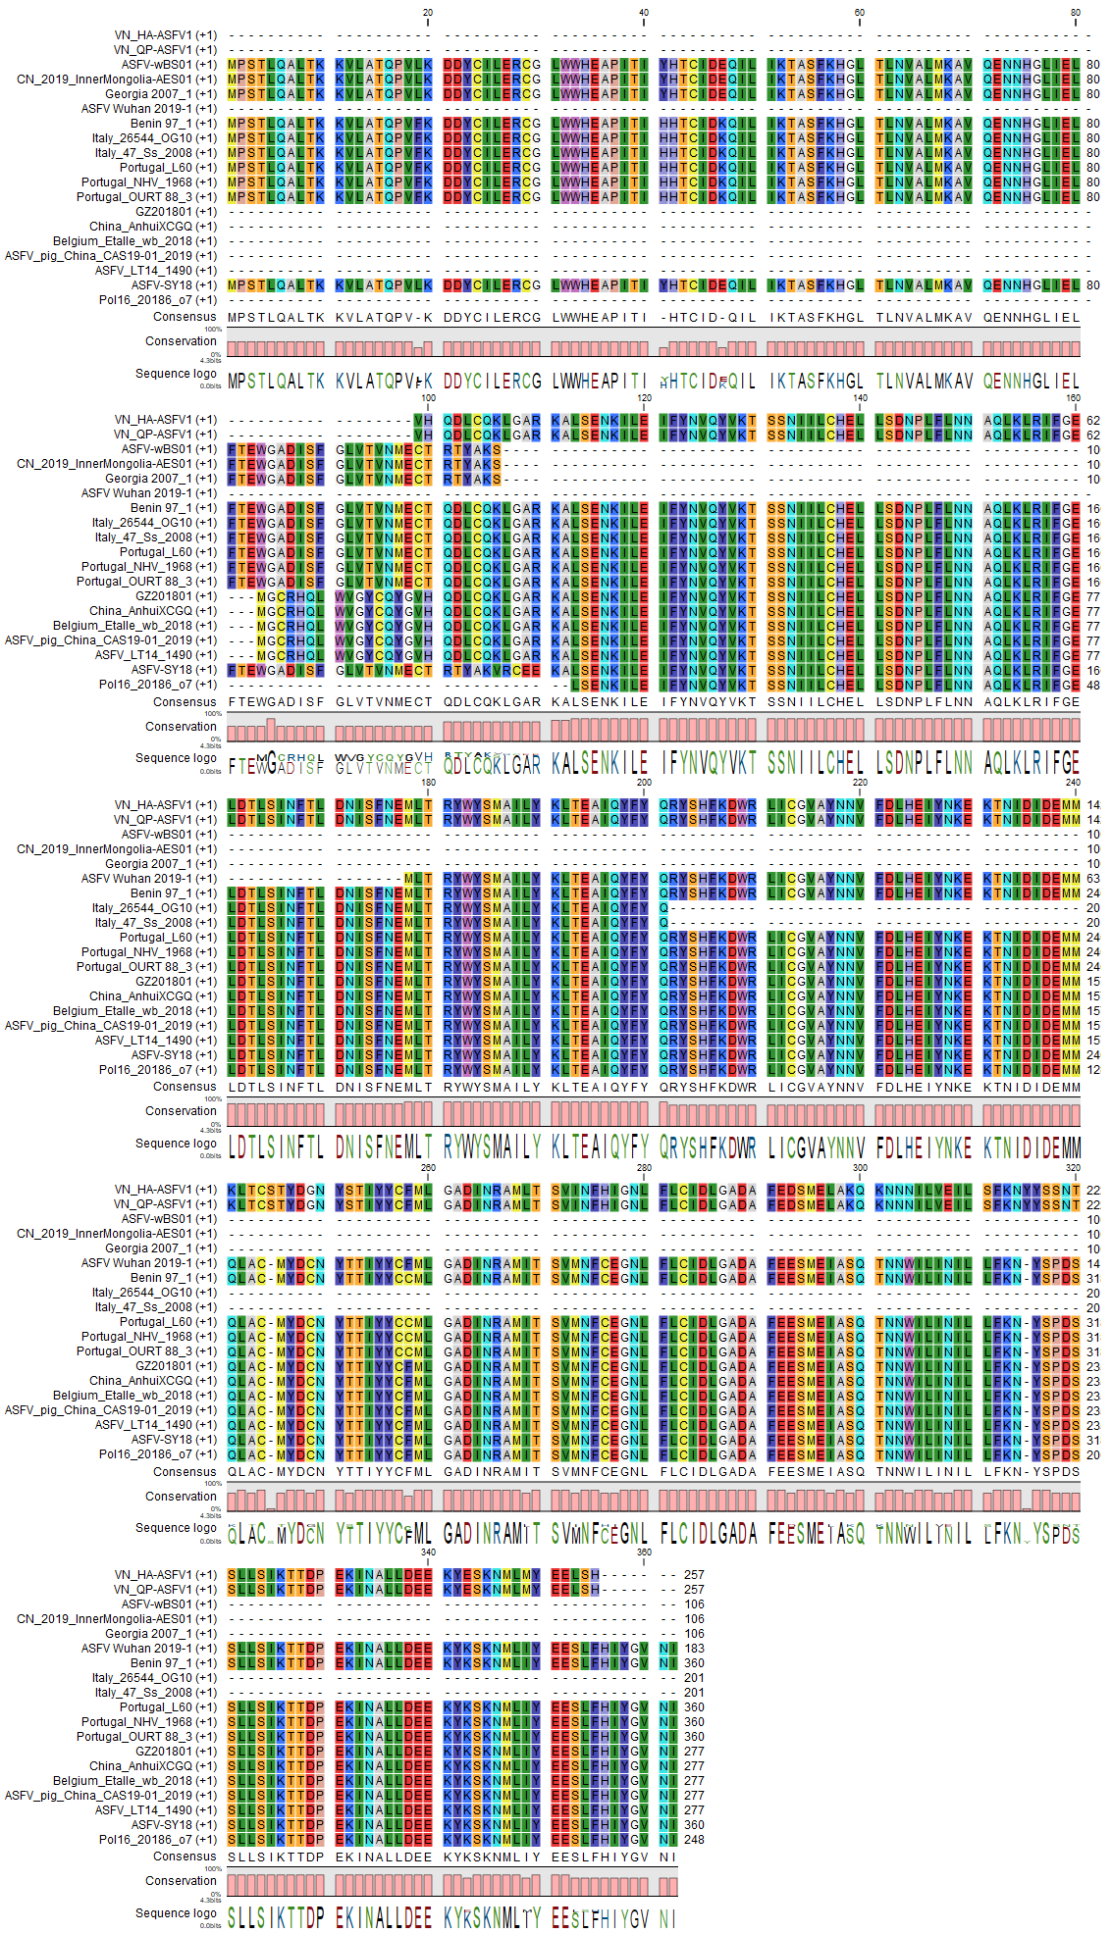



(e) Sequence Alignment of MGF110-1L nucleotides

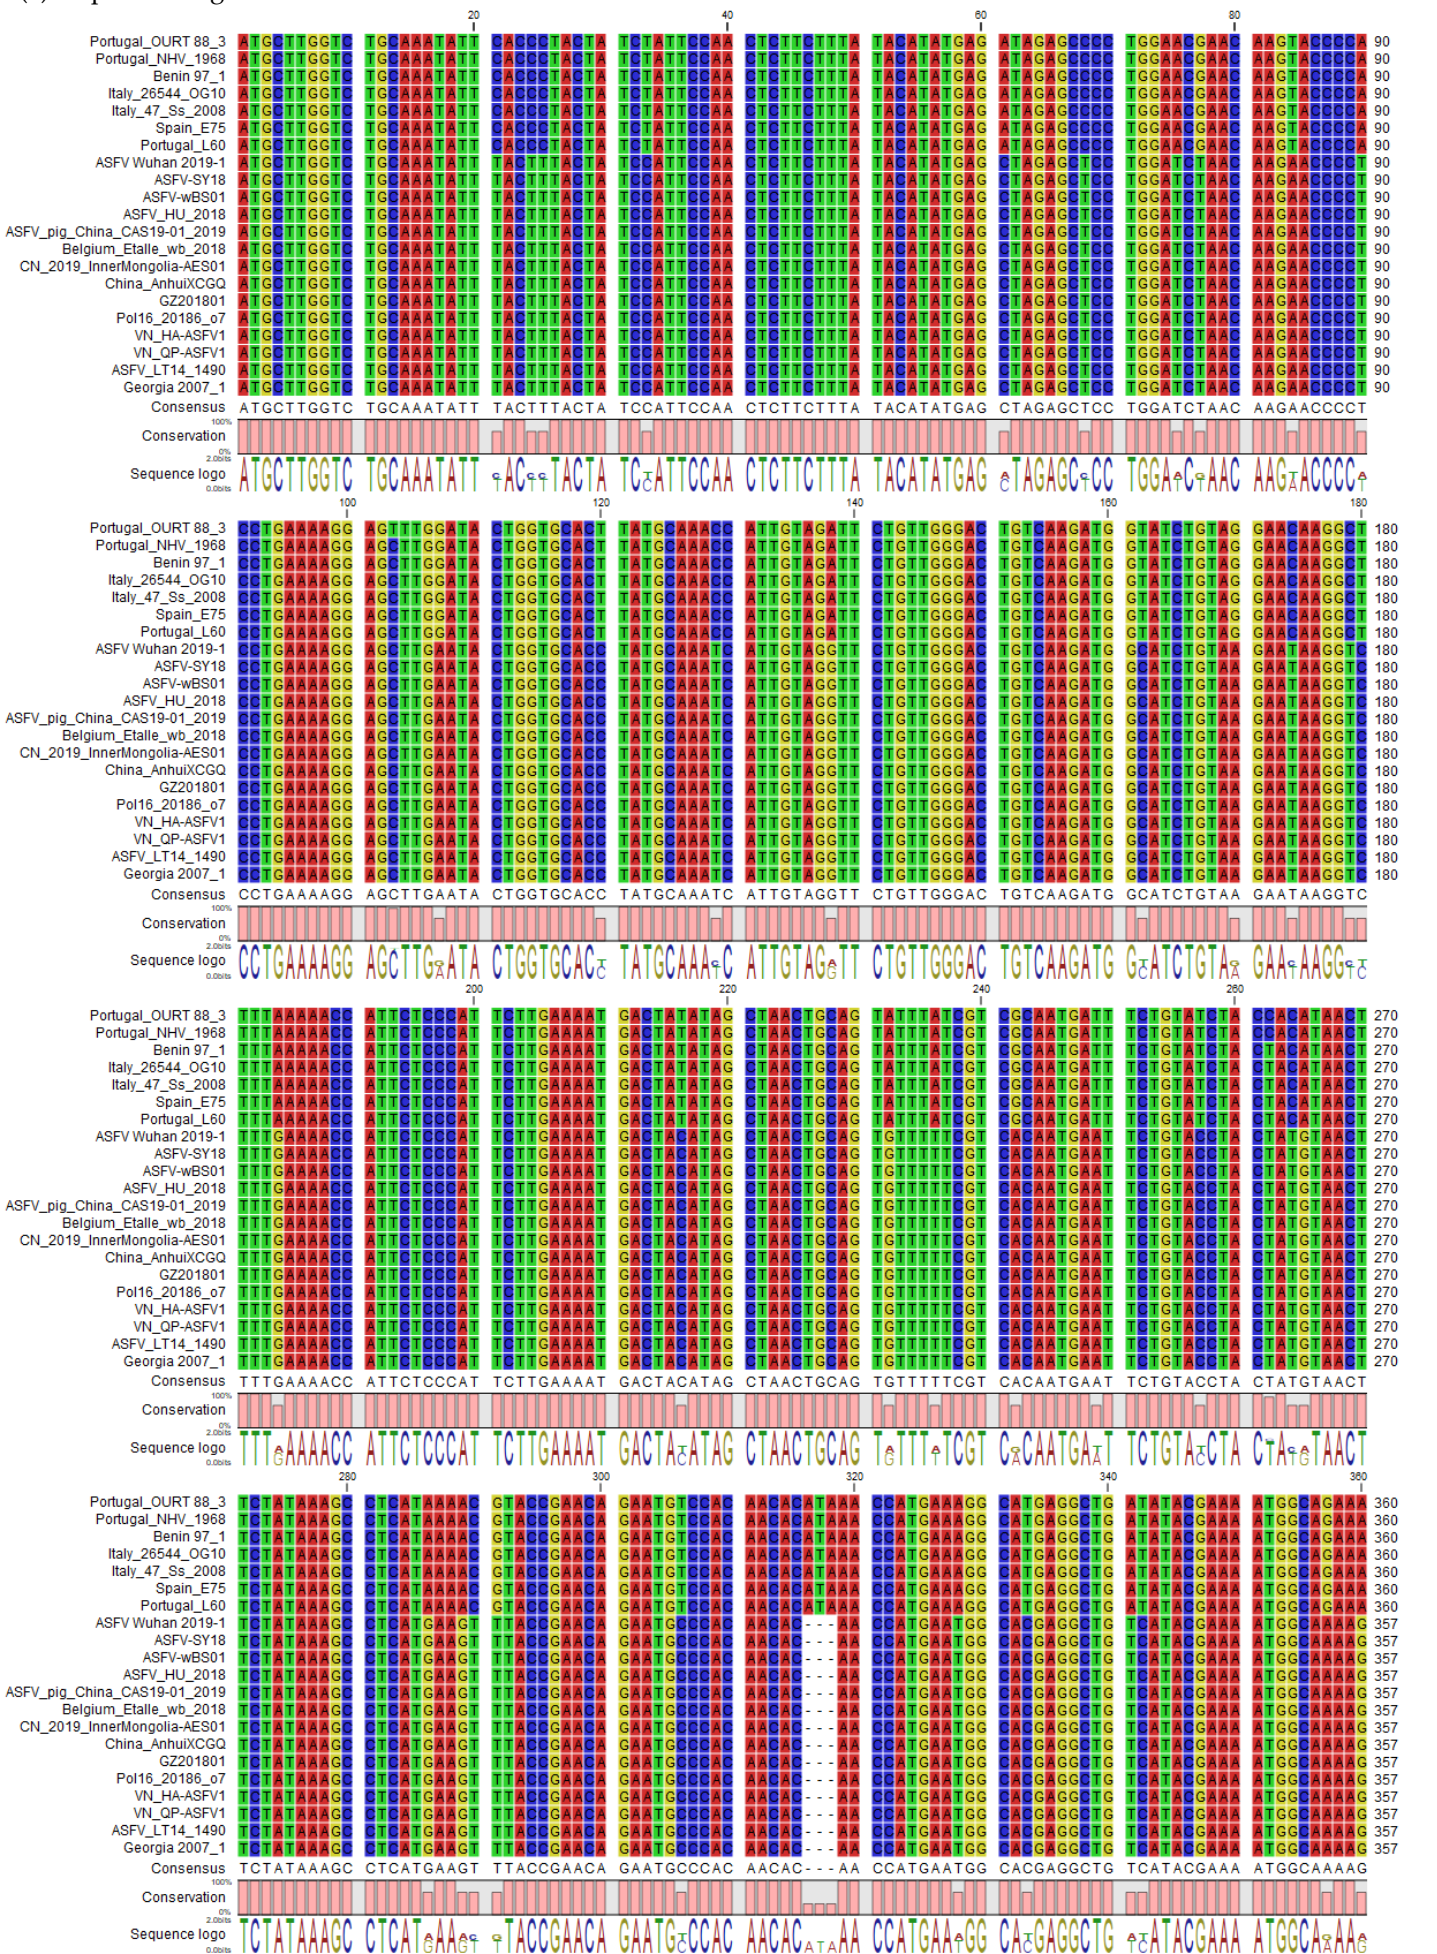



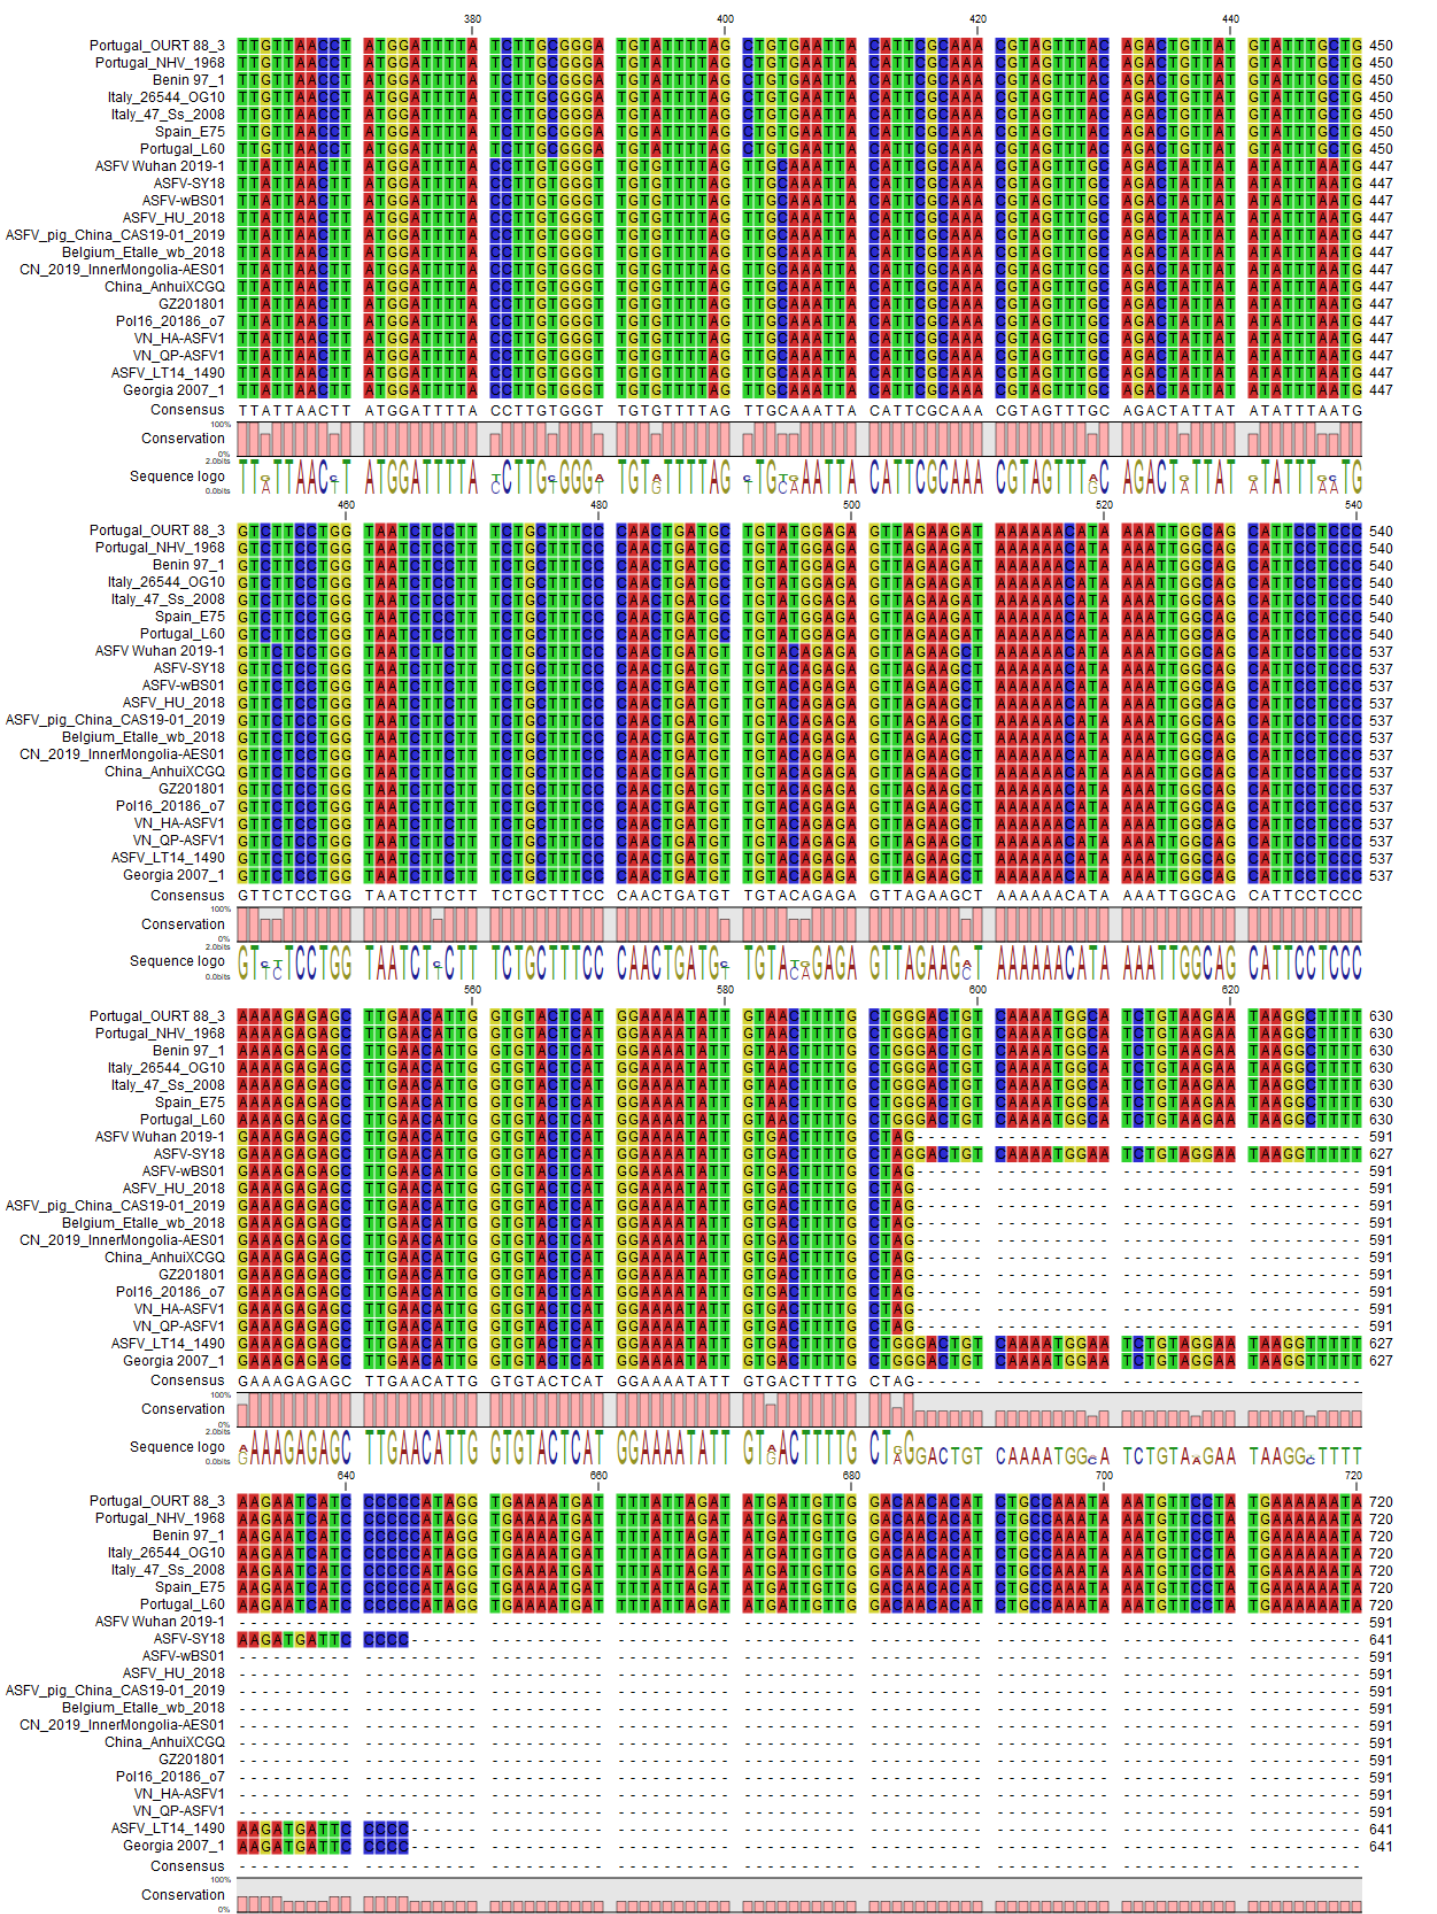



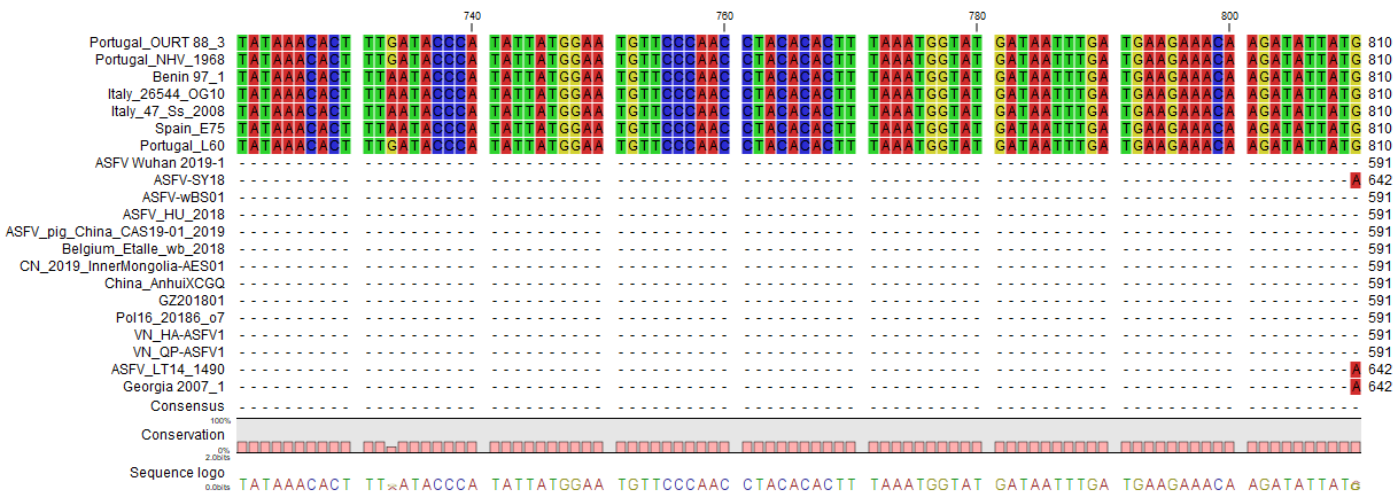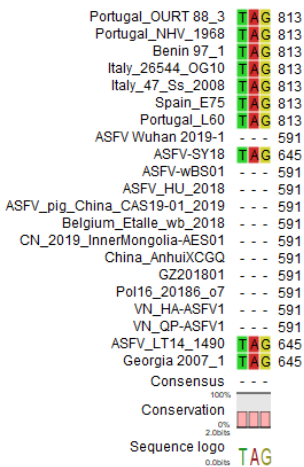

(f) Sequence Alignment of MGF110-1L proteins

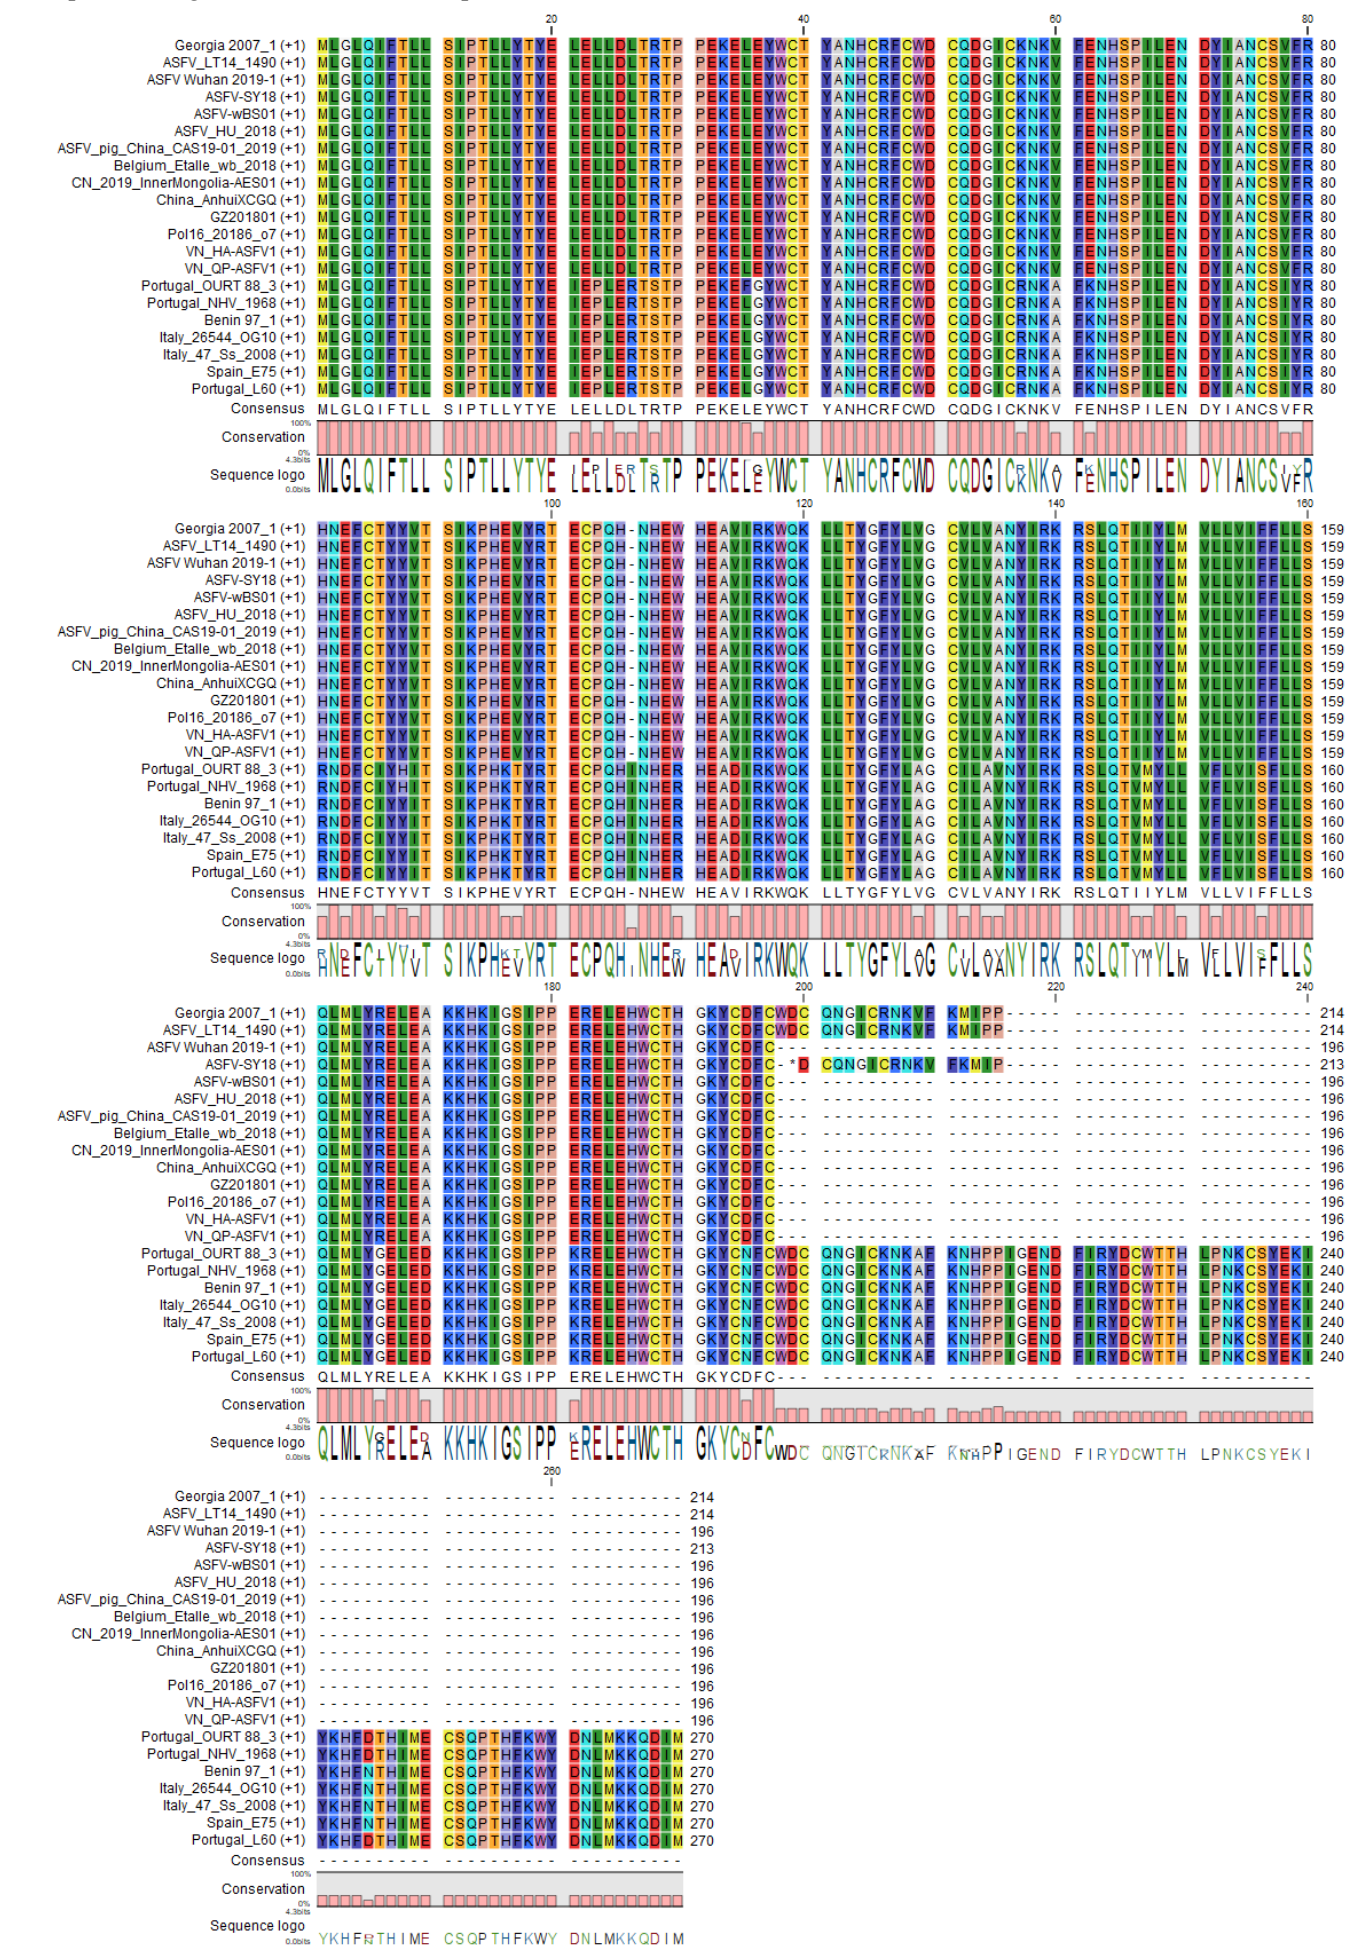

Supplement: s1 [file s1]
