# Supplementary material for: A Whole-Genome Analysis of the African Swine Fever Virus That Circulated during the First Outbreak in Vietnam in 2019 and Subsequently in 2022
Source: MDPI journal article supplement (doi:10.3390/v15091945), 2023-09-18
Supplement: s1 [file s1]

Table S3. Sequence identities of 28 ORFs compared VN/HY/2019-ASFV1 and VN/QP/2019-ASFV1 with 22 particular ASFV strains

## (a) Sequence identities of nucleotides

| ASFV strain name             | O174L  | NP419L | 1GF_505-91GF_505-5 | GF_360-21GF_360-1 | GF_360-16GF_360-14 | GF_110-1GF_110-13 | GF_110-13GF_110-1 | M1249L | L11L   | KP177R | K145R  | I73R   | I267L  | I196L  | EP153R | E199L  | DP238L | D1133L | CP204L | CP123L | C84L   | C717R  | C315R  |        |        |        |        |        |
|------------------------------|--------|--------|--------------------|-------------------|--------------------|-------------------|-------------------|--------|--------|--------|--------|--------|--------|--------|--------|--------|--------|--------|--------|--------|--------|--------|--------|--------|--------|--------|--------|--------|
| VN/QP/2019-ASFV1             | 100.00 | 99.92  | 100.00             | 100.00            | 100.00             | 100.00            | 100.00            | 100.00 | 100.00 | 100.00 | 100.00 | 100.00 | 100.00 | 100.00 | 100.00 | 99.83  | 100.00 | 100.00 | 100.00 | 100.00 | 100.00 | 100.00 | 100.00 |        |        |        |        |        |
| VN/HY/2019-ASFV1             | 100.00 | 100.00 | 100.00             | 100.00            | 100.00             | 100.00            | 100.00            | 100.00 | 100.00 | 100.00 | 100.00 | 100.00 | 100.00 | 100.00 | 100.00 | 100.00 | 100.00 | 100.00 | 100.00 | 100.00 | 100.00 | 100.00 | 100.00 |        |        |        |        |        |
| Spain_E75                    | 97.33  | 98.65  | 97.50              | 98.73             | 82.44              | 82.41             | 98.11             | 98.49  | 89.02  | 95.68  | 99.95  | 98.95  | 98.82  | 98.22  | 97.56  | 98.85  | 96.80  | 97.63  | 93.26  | 56.81  | 99.33  | 98.88  | 99.14  | 97.77  | 95.69  | 99.22  | 99.07  | 99.05  |
| Spain_BA71                   | 97.52  | 98.65  | 97.50              | 98.86             | 77.96              | 92.18             | 98.20             | 98.49  | 100.00 | 22.41  | 12.36  | 12.36  | 98.85  | 98.23  | 97.56  | 98.85  | 96.34  | 97.63  | 93.26  | 56.81  | 99.83  | 98.88  | 99.17  | 97.77  | 95.69  | 99.21  | 100.00 | 99.15  |
| Portugal_OURT_88_3           | 97.33  | 98.65  | 97.50              | 98.73             | 77.96              | 92.18             | 98.11             | 2.43   | 88.68  | 83.79  | 69.18  | 69.18  | 98.88  | 97.87  | 97.56  | 98.85  | 96.80  | 97.63  | 93.26  | 56.81  | 99.33  | 98.88  | 99.18  | 97.60  | 95.69  | 99.22  | 99.12  | 99.16  |
| Portugal_NHV_1968            | 97.33  | 98.65  | 97.50              | 98.73             | 77.96              | 92.18             | 98.11             | 2.43   | 88.85  | 83.84  | 69.18  | 69.18  | 98.88  | 97.87  | 97.56  | 98.85  | 96.80  | 97.63  | 93.26  | 56.81  | 99.33  | 98.88  | 99.18  | 96.92  | 95.69  | 99.22  | 99.12  | 99.16  |
| Portugal_L60                 | 97.33  | 98.65  | 97.50              | 98.73             | 77.96              | 92.18             | 98.20             | 98.49  | 89.02  | 95.68  | 97.27  | 97.27  | 98.85  | 97.87  | 97.56  | 98.85  | 96.80  | 97.63  | 93.26  | 56.81  | 99.50  | 98.88  | 99.18  | 97.77  | 95.69  | 99.22  | 99.12  | 99.16  |
| Pol16_20186_o7               | 100.00 | 100.00 | 100.00             | 99.93             | 100.00             | 93.04             | 99.91             | 99.88  | 100.00 | 99.15  | 99.58  | 99.58  | 100.00 | 100.00 | 100.00 | 99.77  | 100.00 | 100.00 | 100.00 | 100.00 | 99.67  | 100.00 | 100.00 | 100.00 | 100.00 | 100.00 | 100.00 | 100.00 |
| Italy_47_Ss_2008             | 97.33  | 98.65  | 97.43              | 98.73             | 77.96              | 92.06             | 97.92             | 98.37  | 89.02  | 94.82  | 97.27  | 97.27  | 98.82  | 98.22  | 97.56  | 98.63  | 96.80  | 97.63  | 93.26  | 56.81  | 99.50  | 98.88  | 99.18  | 97.77  | 95.69  | 99.22  | 99.03  | 99.05  |
| Italy_26544_OG10             | 97.33  | 98.65  | 97.43              | 98.73             | 77.96              | 92.06             | 98.01             | 98.49  | 89.02  | 95.11  | 97.48  | 97.48  | 98.80  | 98.22  | 97.56  | 98.63  | 96.80  | 97.63  | 93.26  | 56.81  | 99.50  | 98.88  | 99.18  | 97.77  | 95.69  | 99.22  | 99.03  | 99.16  |
| GZ201801                     | 99.81  | 100.00 | 100.00             | 100.00            | 100.00             | 93.04             | 100.00            | 99.88  | 100.00 | 100.00 | 99.58  | 99.58  | 100.00 | 100.00 | 100.00 | 100.00 | 100.00 | 100.00 | 100.00 | 100.00 | 99.83  | 100.00 | 100.00 | 100.00 | 100.00 | 100.00 | 100.00 | 100.00 |
| Georgia_2007_1               | 100.00 | 99.92  | 99.93              | 100.00            | 100.00             | 93.04             | 100.00            | 99.88  | 99.66  | 99.13  | 99.58  | 99.58  | 100.00 | 100.00 | 100.00 | 100.00 | 99.87  | 100.00 | 100.00 | 100.00 | 99.83  | 100.00 | 100.00 | 100.00 | 100.00 | 100.00 | 100.00 | 100.00 |
| Estonia_2014                 | 100.00 | 100.00 | 100.00             | 100.00            | 100.00             | 89.26             | 100.00            | 99.88  | 10.32  | 81.38  | 32.70  | 32.70  | 100.00 | 100.00 | 33.52  | 100.00 | 100.00 | 100.00 | 100.00 | 100.00 | 99.83  | 100.00 | 100.00 | 100.00 | 100.00 | 100.00 | 100.00 | 100.00 |
| CN_2019_InnerMongolia-AES01  | 100.00 | 100.00 | 100.00             | 100.00            | 100.00             | 93.04             | 100.00            | 99.88  | 100.00 | 100.00 | 99.58  | 99.58  | 99.95  | 100.00 | 100.00 | 100.00 | 98.63  | 100.00 | 100.00 | 100.00 | 99.83  | 100.00 | 100.00 | 99.83  | 99.73  | 100.00 | 100.00 | 100.00 |
| China_AnhuiXCGQ              | 99.43  | 100.00 | 100.00             | 100.00            | 100.00             | 92.06             | 100.00            | 99.88  | 100.00 | 100.00 | 99.58  | 99.58  | 100.00 | 100.00 | 100.00 | 100.00 | 100.00 | 100.00 | 100.00 | 100.00 | 99.83  | 100.00 | 100.00 | 100.00 | 100.00 | 100.00 | 100.00 | 100.00 |
| Benin_97_1                   | 97.33  | 98.65  | 97.50              | 98.73             | 77.96              | 92.18             | 97.92             | 98.49  | 89.02  | 94.82  | 97.27  | 97.27  | 98.85  | 97.87  | 97.56  | 98.85  | 96.80  | 97.51  | 93.26  | 56.81  | 99.50  | 98.74  | 99.18  | 97.77  | 95.69  | 99.22  | 99.07  | 99.16  |
| Belgium_Etalle_wb_2018       | 100.00 | 100.00 | 100.00             | 100.00            | 100.00             | 93.04             | 100.00            | 99.88  | 100.00 | 99.13  | 99.58  | 99.58  | 100.00 | 100.00 | 100.00 | 100.00 | 100.00 | 100.00 | 100.00 | 100.00 | 99.83  | 100.00 | 100.00 | 100.00 | 100.00 | 100.00 | 100.00 | 100.00 |
| ASFV-wBS01                   | 100.00 | 100.00 | 100.00             | 100.00            | 100.00             | 93.04             | 100.00            | 99.88  | 100.00 | 99.15  | 99.58  | 99.58  | 99.97  | 99.65  | 100.00 | 100.00 | 100.00 | 100.00 | 99.67  | 99.79  | 99.83  | 99.58  | 99.97  | 100.00 | 100.00 | 100.00 | 100.00 | 100.00 |
| ASFV_Wuhan_2019-1            | 100.00 | 100.00 | 100.00             | 100.00            | 99.91              | 93.04             | 100.00            | 100.00 | 100.00 | 98.85  | 99.16  | 99.16  | 100.00 | 100.00 | 100.00 | 100.00 | 100.00 | 100.00 | 100.00 | 98.75  | 99.83  | 100.00 | 100.00 | 100.00 | 100.00 | 100.00 | 99.95  | 100.00 |
| ASFV_pig_China_CAS19-01_2019 | 100.00 | 100.00 | 100.00             | 100.00            | 100.00             | 93.04             | 100.00            | 99.88  | 100.00 | 99.15  | 99.58  | 99.58  | 100.00 | 100.00 | 100.00 | 100.00 | 100.00 | 100.00 | 100.00 | 100.00 | 99.83  | 100.00 | 100.00 | 100.00 | 100.00 | 100.00 | 100.00 | 100.00 |
| ASFV_LT14_1490               | 100.00 | 99.92  | 99.93              | 100.00            | 100.00             | 93.04             | 100.00            | 99.88  | 99.66  | 99.13  | 98.32  | 98.32  | 100.00 | 100.00 | 100.00 | 100.00 | 100.00 | 99.88  | 100.00 | 100.00 | 99.67  | 100.00 | 100.00 | 100.00 | 100.00 | 100.00 | 100.00 | 100.00 |
| ASFV_HU_2018                 | 100.00 | 100.00 | 100.00             | 100.00            | 100.00             | 93.04             | 100.00            | 99.88  | 100.00 | 99.13  | 99.58  | 99.58  | 100.00 | 100.00 | 100.00 | 100.00 | 100.00 | 100.00 | 100.00 | 100.00 | 99.83  | 100.00 | 100.00 | 100.00 | 100.00 | 100.00 | 100.00 | 99.89  |

## (b) Sequence identities of proteins

| ASFV strain name             | O174L | NP419L | 1GF_505-91GF_505-5 | GF_360-21GF_360-1 | GF_360-16GF_360-14 | GF_110-1GF_110-13 | GF_110-13GF_110-1 | M1249L | L11L  | KP177R | K145R | I73R  | I267L | I196L | EP153R | E199L | DP238L | D1133L | CP204L | CP123L | C84L | C717R | C315R |       |       |       |       |     |
|------------------------------|-------|--------|--------------------|-------------------|--------------------|-------------------|-------------------|--------|-------|--------|-------|-------|-------|-------|--------|-------|--------|--------|--------|--------|------|-------|-------|-------|-------|-------|-------|-----|
| VN/QP/2019-ASFV1             | 100   | 99.76  | 100                | 100               | 100                | 100               | 100               | 100    | 100   | 100    | 100   | 100   | 100   | 100   | 100    | 99.5  | 100    | 100    | 100    | 100    | 100  | 100   | 100   |       |       |       |       |     |
| VN/HY/2019-ASFV1             | 100   | 100    | 100                | 100               | 100                | 100               | 100               | 100    | 100   | 100    | 100   | 100   | 100   | 100   | 100    | 100   | 100    | 100    | 100    | 100    | 100  | 100   | 100   |       |       |       |       |     |
| Spain_E75                    | 96.57 | 99.05  | 97.04              | 98.6              | 81.48              | 73.71             | 96.76             | 97.91  | 83.25 | 92     | 98.52 | 98.1  | 98.71 | 95.74 | 98.31  | 100   | 98.59  | 97.39  | 90.16  | 51.38  | 98.5 | 98.57 | 99.82 | 97.95 | 95.97 | 98.82 | 100   | 100 |
| Spain_BA71                   | 96.57 | 99.05  | 97.04              | 98.6              | 81.48              | 90.08             | 98.02             | 97.91  | 83.25 | 51.79  | 45.45 | 46.73 | 99.28 | 95.74 | 98.31  | 100   | 98.59  | 97.39  | 90.16  | 51.38  | 99.5 | 98.57 | 99.91 | 97.95 | 95.97 | 98.82 | 100   | 100 |
| Portugal_OURT_88_3           | 96.57 | 99.05  | 97.04              | 98.4              | 71.95              | 90.08             | 96.76             | 36.59  | 82.23 | 76.7   | 93.6  | 69.03 | 99.36 | 91.4  | 98.31  | 100   | 98.59  | 97.39  | 90.16  | 51.38  | 98   | 98.57 | 99.91 | 97.44 | 95.97 | 98.82 | 100   | 100 |
| Portugal_NHV_1968            | 96.57 | 99.05  | 97.04              | 98.4              | 71.95              | 90.08             | 96.76             | 36.59  | 82.74 | 76.92  | 93.65 | 69.03 | 99.36 | 91.4  | 98.31  | 100   | 98.59  | 97.39  | 90.16  | 51.38  | 98   | 98.57 | 99.91 | 97.34 | 95.97 | 98.82 | 100   | 100 |
| Portugal_L60                 | 96.57 | 99.05  | 97.04              | 98.6              | 71.95              | 90.08             | 94.92             | 97.91  | 83.25 | 92     | 97.04 | 98.06 | 98.8  | 94.62 | 98.31  | 100   | 98.59  | 97.39  | 90.16  | 51.38  | 98.5 | 98.57 | 99.91 | 97.95 | 95.97 | 98.82 | 100   | 100 |
| Pol16_20186_o7               | 100   | 100    | 100                | 99.8              | 100                | 91.08             | 100               | 98.95  | 100   | 100    | 100   | 100   | 100   | 100   | 100    | 99    | 100    | 100    | 100    | 100    | 100  | 100   | 100   | 100   | 100   | 100   | 100   | 100 |
| Italy_47_Ss_2008             | 96.57 | 99.05  | 97.04              | 98.6              | 81.48              | 89.68             | 98.94             | 97.56  | 83.25 | 91.92  | 97.62 | 95.51 | 99.28 | 95.74 | 98.31  | 99.32 | 98.59  | 97.39  | 90.16  | 51.38  | 98.5 | 98.57 | 99.91 | 97.95 | 95.97 | 98.82 | 99.86 | 100 |
| Italy_26544_OG10             | 96.57 | 99.05  | 97.04              | 98.6              | 81.48              | 89.68             | 98.02             | 97.91  | 83.25 | 91.92  | 97.62 | 96.15 | 99.28 | 95.74 | 98.31  | 99.32 | 98.59  | 97.39  | 90.16  | 51.38  | 98.5 | 98.57 | 99.91 | 97.95 | 95.97 | 98.82 | 99.86 | 100 |
| GZ201801                     | 99.43 | 100    | 100                | 100               | 100                | 91.08             | 100               | 98.95  | 100   | 100    | 100   | 100   | 100   | 100   | 100    | 100   | 100    | 100    | 100    | 100    | 100  | 100   | 100   | 100   | 100   | 100   | 100   | 100 |
| Georgia_2007_1               | 100   | 99.76  | 99.8               | 100               | 100                | 91.08             | 100               | 98.95  | 100   | 100    | 100   | 100   | 100   | 100   | 100    | 99.5  | 100    | 100    | 100    | 100    | 100  | 100   | 100   | 100   | 100   | 100   | 100   | 100 |
| Estonia_2014                 | 100   | 100    | 100                | 100               | 100                | 83.2              | 100               | 98.95  | 50.67 | 73.08  | 100   | 100   | 100   | 100   | 40.62  | 100   | 100    | 100    | 100    | 100    | 99.5 | 100   | 100   | 100   | 100   | 100   | 100   | 100 |
| CN_2019_InnerMongolia-AES01  | 100   | 100    | 100                | 100               | 100                | 91.08             | 100               | 98.95  | 100   | 100    | 99.19 | 100   | 99.92 | 100   | 100    | 100   | 100    | 100    | 100    | 100    | 99.5 | 100   | 100   | 99.49 | 99.19 | 100   | 100   | 100 |
| China_AnhuiXCGQ              | 98.29 | 100    | 100                | 100               | 100                | 91.08             | 100               | 98.95  | 100   | 100    | 100   | 100   | 100   | 100   | 100    | 100   | 100    | 100    | 100    | 100    | 99.5 | 100   | 100   | 100   | 100   | 100   | 100   | 100 |
| Benin_97_1                   | 96.57 | 99.05  | 97.04              | 98.6              | 81.48              | 90.08             | 94.55             | 97.91  | 83.25 | 91.92  | 97.04 | 98.06 | 99.28 | 96.34 | 98.31  | 100   | 98.59  | 97.39  | 90.16  | 51.38  | 98.5 | 98.1  | 99.91 | 97.95 | 95.97 | 98.82 | 100   | 100 |
| Belgium_Etalle_wb_2018       | 100   | 100    | 100                | 100               | 100                | 91.08             | 100               | 98.95  | 100   | 100    | 100   | 100   | 100   | 100   | 100    | 100   | 100    | 100    | 100    | 100    | 99.5 | 100   | 100   | 100   | 100   | 100   | 100   | 100 |
| ASFV-wBS01                   | 100   | 100    | 100                | 100               | 100                | 91.08             | 100               | 98.95  | 100   | 100    | 100   | 100   | 99.92 | 98.94 | 100    | 100   | 100    | 100    | 99.45  | 99.37  | 99.5 | 99.52 | 99.91 | 100   | 100   | 100   | 100   | 100 |
| ASFV_Wuhan_2019-1            | 100   | 100    | 100                | 100               | 99.72              | 91.08             | 100               | 100    | 100   | 100    | 100   | 100   | 100   | 100   | 100    | 98.76 | 99.5   | 100    | 100    | 100    | 100  | 100   | 100   | 100   | 100   | 99.86 | 100   | 100 |
| ASFV_pig_China_CAS19-01_2019 | 100   | 100    | 100                | 100               | 100                | 91.08             | 100               | 98.95  | 100   | 100    | 100   | 100   | 100   | 100   | 100    | 100   | 99.5   | 100    | 100    | 100    | 100  | 100   | 100   | 100   | 100   | 100   | 100   | 100 |
| ASFV_LT14_1490               | 100   | 99.76  | 99.8               | 100               | 100                | 91.08             | 100               | 98.95  | 100   | 100    | 98.52 | 100   | 100   | 100   | 100    | 100   | 99.63  | 100    | 100    | 99     | 100  | 100   | 100   | 100   | 100   | 100   | 100   | 100 |
| ASFV_HU_2018                 | 100   | 100    | 100                | 100               | 100                | 91.08             | 100               | 98.95  | 100   | 100    | 100   | 100   | 100   | 100   | 100    | 100   | 99.5   | 100    | 100    | 100    | 100  | 100   | 100   | 100   | 100   | 100   | 99.68 | 100 |
