# Supplementary material for: A Whole-Genome Analysis of the African Swine Fever Virus That Circulated during the First Outbreak in Vietnam in 2019 and Subsequently in 2022
Source: MDPI journal article supplement (doi:10.3390/v15091945), 2023-09-18
Supplement: s1 [file s1]

Table S2. Whole-genome average nucleotide identity (ANI) and alignment percentage (AP) of 27 ASFV Strains.

|                              | SA/Mkuzi1979 ASFV_HU_2018 ASFV Wuhan 2019-1 ASFV-SY18 ASFV-wBS01 ASFV/IT14/1490 ASFV/pig/China/CAS19-01/2019 Belgium/Etalle/wb/2018 Benin 97/1 CN/2019/InnerMongolia-AES01 China/AnhuiXCGQ Estonia 2014 GZ201801 Georgia 2007/1 Italy/26544/OG10 Italy/47/Ss/2008 Kashino 04/13 POL/2015/Podlaskie Pol16_20186_o7 Portugal/L60 Portugal/NHV/1968 Portugal/OURT 88/3 Russia/Odintsovo_02/14 Spain/BA71 Spain/E75 VNIHY/2019-ASFV1 VNIQ/2019-ASFV1 VNIHY/2022-ASFV2 |       |       |        |       |       |       |        |        |       |       |        |       |        |        |       |       |       |        |       |       |       |       |       |       |       |       |        |       |
|------------------------------|-------------------------------------------------------------------------------------------------------------------------------------------------------------------------------------------------------------------------------------------------------------------------------------------------------------------------------------------------------------------------------------------------------------------------------------------------------------------|-------|-------|--------|-------|-------|-------|--------|--------|-------|-------|--------|-------|--------|--------|-------|-------|-------|--------|-------|-------|-------|-------|-------|-------|-------|-------|--------|-------|
|                              | 1                                                                                                                                                                                                                                                                                                                                                                                                                                                                 | 2     | 3     | 4      | 5     | 6     | 7     | 8      | 9      | 10    | 11    | 12     | 13    | 14     | 15     | 16    | 17    | 18    | 19     | 20    | 21    | 22    | 23    | 24    | 25    | 26    | 27    | 28     |       |
| SA/Mkuzi1979                 | 1                                                                                                                                                                                                                                                                                                                                                                                                                                                                 |       | 96.89 | 96.89  | 96.86 | 96.88 | 96.89 | 96.89  | 96.89  | 98.00 | 96.88 | 96.89  | 96.95 | 96.88  | 96.89  | 98.03 | 98.03 | 96.89 | 96.89  | 96.89 | 98.03 | 97.80 | 97.83 | 96.86 | 98.09 | 97.91 | 96.83 | 96.83  | 96.87 |
| ASFV_HU_2018                 | 2                                                                                                                                                                                                                                                                                                                                                                                                                                                                 | 95.11 |       | 100.00 | 99.98 | 99.99 | 99.99 | 100.00 | 100.00 | 97.18 | 99.99 | 100.00 | 99.92 | 99.99  | 99.99  | 97.19 | 97.19 | 99.98 | 99.99  | 99.99 | 97.27 | 97.14 | 97.22 | 99.98 | 97.10 | 97.07 | 99.93 | 99.93  | 99.92 |
| ASFV Wuhan 2019-1            | 3                                                                                                                                                                                                                                                                                                                                                                                                                                                                 | 95.11 | 99.66 |        | 99.98 | 99.99 | 99.99 | 100.00 | 100.00 | 97.18 | 99.99 | 100.00 | 99.93 | 99.99  | 99.99  | 97.19 | 97.19 | 99.98 | 99.99  | 99.99 | 97.27 | 97.14 | 97.22 | 99.98 | 97.10 | 97.08 | 99.93 | 99.93  | 99.92 |
| ASFV-SY18                    | 4                                                                                                                                                                                                                                                                                                                                                                                                                                                                 | 95.42 | 99.46 | 99.46  |       | 99.98 | 99.97 | 99.98  | 99.98  | 97.15 | 99.97 | 99.98  | 99.91 | 99.97  | 99.98  | 97.16 | 97.16 | 99.97 | 99.97  | 99.98 | 97.24 | 97.13 | 97.21 | 99.97 | 97.08 | 97.05 | 99.92 | 99.92  | 99.90 |
| ASFV-wBS01                   | 5                                                                                                                                                                                                                                                                                                                                                                                                                                                                 | 95.41 | 99.47 | 99.47  | 99.81 |       | 99.99 | 99.99  | 99.99  | 97.17 | 99.99 | 99.99  | 99.92 | 99.99  | 99.99  | 97.19 | 97.19 | 99.97 | 99.98  | 99.99 | 97.27 | 97.13 | 97.22 | 99.97 | 97.09 | 97.07 | 99.93 | 99.93  | 99.91 |
| ASFV/IT14/1490               | 6                                                                                                                                                                                                                                                                                                                                                                                                                                                                 | 95.41 | 99.47 | 99.47  | 99.87 | 99.82 |       | 99.99  | 99.99  | 97.17 | 99.98 | 99.99  | 99.86 | 99.98  | 99.99  | 97.19 | 97.19 | 99.97 | 100.00 | 99.99 | 97.27 | 97.14 | 97.22 | 99.97 | 97.10 | 97.07 | 99.93 | 99.93  | 99.91 |
| ASFV/pig/China/CAS19-01/2019 | 7                                                                                                                                                                                                                                                                                                                                                                                                                                                                 | 95.41 | 99.47 | 99.48  | 99.87 | 99.82 | 99.99 |        | 100.00 | 97.18 | 99.99 | 99.99  | 99.87 | 99.99  | 99.99  | 97.19 | 97.19 | 99.97 | 99.99  | 99.99 | 97.27 | 97.14 | 97.22 | 99.98 | 97.10 | 97.07 | 99.93 | 99.93  | 99.92 |
| Belgium/Etalle/wb/2018       | 8                                                                                                                                                                                                                                                                                                                                                                                                                                                                 | 95.21 | 99.28 | 99.29  | 99.66 | 99.61 | 99.78 | 99.79  |        | 97.18 | 99.99 | 99.99  | 99.92 | 99.99  | 100.00 | 97.19 | 97.19 | 99.98 | 99.99  | 99.99 | 97.27 | 97.14 | 97.22 | 99.98 | 97.10 | 97.07 | 99.93 | 99.93  | 99.92 |
| Benin 97/1                   | 9                                                                                                                                                                                                                                                                                                                                                                                                                                                                 | 95.10 | 94.51 | 94.52  | 94.82 | 94.81 | 94.81 | 94.81  | 94.61  |       | 97.17 | 97.17  | 97.13 | 97.17  | 97.18  | 99.94 | 99.94 | 97.16 | 97.18  | 97.17 | 99.92 | 99.83 | 99.83 | 97.06 | 99.86 | 99.93 | 97.02 | 97.02  | 97.04 |
| CN/2019/InnerMongolia-AES01  | 10                                                                                                                                                                                                                                                                                                                                                                                                                                                                | 95.41 | 99.47 | 99.48  | 99.77 | 99.78 | 99.78 | 99.78  | 99.58  | 94.81 |       | 99.99  | 99.91 | 99.98  | 99.99  | 97.18 | 97.18 | 99.97 | 99.98  | 99.99 | 97.26 | 97.13 | 97.21 | 99.97 | 97.09 | 97.07 | 99.93 | 99.93  | 99.91 |
| China/AnhuiXCGQ              | 11                                                                                                                                                                                                                                                                                                                                                                                                                                                                | 95.41 | 99.47 | 99.48  | 99.87 | 99.82 | 99.99 | 100.00 | 99.78  | 94.81 | 99.79 |        | 99.87 | 99.99  | 99.99  | 97.19 | 97.19 | 99.97 | 99.99  | 99.99 | 97.27 | 97.14 | 97.22 | 99.98 | 97.10 | 97.07 | 99.93 | 99.93  | 99.91 |
| Estonia 2014                 | 12                                                                                                                                                                                                                                                                                                                                                                                                                                                                | 91.78 | 94.53 | 94.65  | 94.39 | 94.34 | 94.47 | 94.47  | 94.42  | 93.77 | 94.31 | 94.47  |       | 99.86  | 99.81  | 97.13 | 97.13 | 99.90 | 99.86  | 99.87 | 97.16 | 97.29 | 97.35 | 99.90 | 97.13 | 97.23 | 99.90 | 99.99  | 99.97 |
| GZ201801                     | 13                                                                                                                                                                                                                                                                                                                                                                                                                                                                | 95.41 | 99.47 | 99.48  | 99.87 | 99.82 | 99.99 | 100.00 | 99.78  | 94.81 | 99.79 | 100.00 | 94.47 |        | 99.99  | 97.18 | 97.18 | 99.97 | 99.98  | 99.99 | 97.26 | 97.13 | 97.21 | 99.97 | 97.10 | 97.06 | 99.92 | 99.93  | 99.91 |
| Georgia 2007/1               | 14                                                                                                                                                                                                                                                                                                                                                                                                                                                                | 95.11 | 99.41 | 99.42  | 99.50 | 99.51 | 99.51 | 99.51  | 99.32  | 94.52 | 99.47 | 99.51  | 94.87 | 99.51  |        | 97.19 | 97.19 | 99.98 | 99.99  | 99.99 | 97.27 | 97.14 | 97.23 | 99.98 | 97.10 | 97.08 | 99.93 | 99.93  | 99.91 |
| Italy/26544/OG10             | 15                                                                                                                                                                                                                                                                                                                                                                                                                                                                | 94.94 | 94.35 | 94.36  | 94.65 | 94.64 | 94.64 | 94.64  | 94.45  | 99.64 | 94.64 | 94.65  | 93.61 | 94.65  | 94.35  |       | 99.98 | 97.17 | 97.19  | 97.19 | 99.94 | 99.86 | 99.87 | 97.16 | 99.87 | 99.96 | 97.01 | 97.01  | 97.04 |
| Italy/47/Ss/2008             | 16                                                                                                                                                                                                                                                                                                                                                                                                                                                                | 94.48 | 93.90 | 93.90  | 94.20 | 94.19 | 94.19 | 94.19  | 94.00  | 99.14 | 94.19 | 94.19  | 93.17 | 94.19  | 93.90  | 99.37 |       | 97.17 | 97.19  | 97.19 | 99.94 | 99.86 | 99.87 | 97.16 | 99.87 | 99.95 | 97.01 | 97.01  | 97.04 |
| Kashino 04/13                | 17                                                                                                                                                                                                                                                                                                                                                                                                                                                                | 95.31 | 98.09 | 98.10  | 98.40 | 98.40 | 98.40 | 98.20  | 94.72  | 98.40 | 98.40 | 92.90  | 98.40 | 98.10  | 94.59  | 94.14 |       | 99.97 | 99.97  | 97.25 | 97.14 | 97.22 | 99.97 | 97.12 | 97.06 | 99.91 | 99.91 | 99.90  |       |
| POL/2015/Podlaskie           | 18                                                                                                                                                                                                                                                                                                                                                                                                                                                                | 95.41 | 99.47 | 99.47  | 99.86 | 99.82 | 99.99 | 99.99  | 99.78  | 94.81 | 99.78 | 99.99  | 99.47 | 99.99  | 99.51  | 94.64 | 94.19 | 98.40 |        | 99.99 | 97.27 | 97.14 | 97.22 | 99.97 | 97.10 | 97.07 | 99.92 | 99.92  | 99.91 |
| Pol16/20186/o7               | 19                                                                                                                                                                                                                                                                                                                                                                                                                                                                | 95.41 | 99.47 | 99.48  | 99.87 | 99.82 | 99.99 | 100.00 | 99.79  | 94.81 | 99.78 | 100.00 | 94.48 | 100.00 | 99.51  | 94.64 | 94.19 | 98.40 | 99.99  |       | 97.27 | 97.14 | 97.22 | 99.98 | 97.10 | 97.07 | 99.93 | 99.93  | 99.91 |
| Portugal/L60                 | 20                                                                                                                                                                                                                                                                                                                                                                                                                                                                | 95.08 | 93.94 | 93.95  | 94.25 | 94.24 | 94.24 | 94.23  | 94.04  | 99.89 | 94.24 | 94.24  | 93.75 | 94.24  | 93.95  | 99.60 | 99.13 | 94.21 | 94.24  | 94.24 |       | 99.95 | 99.90 | 97.25 | 99.91 | 99.96 | 96.99 | 96.99  | 97.02 |
| Portugal/NHV/1968            | 21                                                                                                                                                                                                                                                                                                                                                                                                                                                                | 93.30 | 92.37 | 92.38  | 92.64 | 92.65 | 92.65 | 92.65  | 92.46  | 94.22 | 92.65 | 92.65  | 89.05 | 92.65  | 92.37  | 93.95 | 93.52 | 92.61 | 92.65  | 92.65 | 93.69 |       | 99.99 | 97.13 | 99.89 | 99.85 | 97.16 | 97.16  | 97.19 |
| Portugal/OURT 88/3           | 22                                                                                                                                                                                                                                                                                                                                                                                                                                                                | 93.29 | 92.34 | 92.35  | 92.62 | 92.62 | 92.62 | 92.62  | 92.44  | 94.31 | 92.62 | 92.62  | 89.12 | 92.62  | 92.34  | 93.99 | 93.56 | 92.58 | 92.62  | 92.62 | 94.16 | 99.89 |       | 97.21 | 99.83 | 99.89 | 97.22 | 97.22  | 97.26 |
| Russia/Odintsovo_02/14       | 23                                                                                                                                                                                                                                                                                                                                                                                                                                                                | 95.43 | 99.45 | 99.45  | 99.87 | 99.80 | 99.86 | 99.86  | 99.86  | 95.38 | 99.76 | 99.86  | 94.38 | 99.86  | 99.49  | 94.66 | 94.21 | 98.39 | 99.86  | 99.86 | 94.25 | 92.64 | 92.61 |       | 97.09 | 97.04 | 99.91 | 99.91  | 99.89 |
| Spain/BA71                   | 24                                                                                                                                                                                                                                                                                                                                                                                                                                                                | 92.87 | 93.37 | 93.38  | 93.67 | 93.66 | 93.66 | 93.47  | 96.73  | 93.66 | 93.66 | 92.01  | 93.66 | 93.38  | 96.55  | 96.10 | 93.23 | 93.66 | 93.66  | 96.87 | 93.49 | 93.39 | 93.68 |       | 99.76 | 97.39 | 97.39 | 97.32  |       |
| Spain/E75                    | 25                                                                                                                                                                                                                                                                                                                                                                                                                                                                | 94.85 | 94.26 | 94.26  | 94.56 | 94.55 | 94.55 | 94.35  | 99.41  | 94.55 | 94.55 | 93.49  | 94.55 | 94.26  | 99.20  | 98.73 | 94.48 | 94.55 | 94.55  | 99.53 | 93.94 | 93.84 | 94.56 | 97.01 |       | 97.09 | 97.09 | 97.12  |       |
| VNIHY/2019-ASFV1             | 26                                                                                                                                                                                                                                                                                                                                                                                                                                                                | 95.48 | 99.39 | 99.40  | 99.69 | 99.70 | 99.70 | 99.70  | 99.49  | 95.43 | 99.70 | 99.71  | 94.38 | 99.71  | 99.39  | 95.26 | 94.81 | 98.32 | 99.70  | 99.70 | 95.41 | 92.58 | 92.06 | 99.68 | 92.06 | 94.62 |       | 100.00 | 99.98 |
| VNIQ/2019-ASFV1              | 27                                                                                                                                                                                                                                                                                                                                                                                                                                                                | 95.49 | 99.40 | 99.40  | 99.70 | 99.71 | 99.71 | 99.72  | 99.50  | 95.44 | 99.71 | 99.72  | 94.39 | 99.72  | 99.40  | 95.27 | 94.82 | 98.33 | 99.71  | 99.71 | 95.42 | 92.58 | 92.07 | 99.69 | 92.07 | 94.63 | 99.80 |        | 99.98 |
| VNIHY/2022-ASFV2             | 28                                                                                                                                                                                                                                                                                                                                                                                                                                                                | 95.36 | 99.24 | 99.25  | 99.54 | 99.55 | 99.55 | 99.55  | 99.34  | 95.31 | 99.55 | 99.56  | 94.24 | 99.56  | 99.24  | 95.14 | 94.69 | 98.17 | 99.55  | 99.55 | 95.29 | 92.49 | 91.97 | 99.53 | 92.50 | 94.50 | 99.64 | 99.64  |       |

\* The area with yellow ANI on the table indicates average nucleotide identity(ANI), and the area with green AP indicates alignment percentage(AP).
