# Supplementary material for: A Whole-Genome Analysis of the African Swine Fever Virus That Circulated during the First Outbreak in Vietnam in 2019 and Subsequently in 2022
Source: MDPI journal article supplement (doi:10.3390/v15091945), 2023-09-18
Supplement: s1 [file s1]

Table S1. List of genetic information for representative 28 ASFV strains used in this study

|    | Name                         | GeneBank No | Length(bp) | p72Genotype | Host      | origin(country) | year |
|----|------------------------------|-------------|------------|-------------|-----------|-----------------|------|
| 1  | VN/HY/2019-ASFV1             | MT872723    | 189,113    | II          | pig       | Vietnam         | 2019 |
| 2  | VN/QP/2019-ASFV1             | MT882025    | 189,081    | II          | pig       | Vietnam         | 2019 |
| 3  | VN/HY/2022-ASFV2             | OR227304    | 189,607    | II          | pig       | Vietnam         | 2022 |
| 4  | China/AnhuiXCGQ              | MK128995    | 189,354    | II          | pig       | China           | 2018 |
| 5  | POL/2015/Podlaskie           | MH681419    | 189,394    | II          | pig       | Poland          | 2015 |
| 6  | Georgia 2007/1               | FR682468    | 189,344    | II          | pig       | Georgia         | 2007 |
| 7  | Estonia 2014                 | LS478113    | 182,446    | II          | Wild boar | Estonia         | 2014 |
| 8  | Russia/Odintsovo_02/14       | KP843857    | 189,333    | II          | Wild boar | Russia          | 2014 |
| 9  | Spain/E75                    | FN557520    | 181,187    | I           | pig       | Spain           | 2010 |
| 10 | SA/Mkuzi1979                 | AY261362    | 192,714    | I/VII       | Tick      | South Africa    | 1979 |
| 11 | Portugal/OURT 88/3           | AM712240    | 171,719    | I           | Tick      | Portugal        | 1988 |
| 12 | Benin 97/1                   | AM712239    | 182,284    | I           | pig       | Benin           | 1997 |
| 13 | Portugal/L60                 | KM262844    | 182,362    | I           | pig       | Portugal        | 1960 |
| 14 | Italy/26544/OG10             | KM102979    | 182,906    | I           | pig       | Italy           | 2010 |
| 15 | Portugal/NHV/1968            | KM262845    | 172,051    | I           | pig       | Portugal        | 1968 |
| 16 | Italy/47/Ss/2008             | KX354450    | 184,638    | I           | pig       | Italy           | 2008 |
| 17 | Spain/BA71                   | KP055815    | 180,365    | I           | pig       | Spain           | 1971 |
| 18 | ASFV-SY18                    | MH766894    | 188,643    | II          | pig       | China           | 2018 |
| 19 | Kashino 04/13                | KJ747406    | 189,387    | II          | Wild boar | Russia          | 2013 |
| 20 | ASFV-wBS01                   | MK645909    | 189,394    | II          | Wild boar | China           | 2018 |
| 21 | Belgium/Etalle/wb/2018       | MK543947    | 190,202    | II          | Wild boar | Belgium         | 2018 |
| 22 | ASFV/LT14/1490               | MK628478    | 189,399    | II          | pig       | Lithuania       | 2014 |
| 23 | ASFV/pig/China/CAS19-01/2019 | MN172368    | 189,405    | II          | pig       | China           | 2019 |
| 24 | ASFV_HU_2018                 | MN715134    | 190,601    | II          | Wild boar | Hungary         | 2018 |
| 25 | ASFV Wuhan 2019-1            | MN393476    | 190,576    | II          | pig       | China           | 2019 |
| 26 | CN/2019/InnerMongolia-AES01  | MK940252    | 189,403    | II          | Wild boar | China           | 2019 |
| 27 | Pol16_20186_o7               | MG939583    | 189,401    | II          | pig       | Poland          | 2018 |
| 28 | GZ201801                     | MT496893    | 189,393    | II          | pig       | China           | 2018 |
